# Supplementary material
Source: publisher figshare collection journal article supplement (https://acs.figshare.com/ndownloader/files/4277488)
Supplement: Supplementary file 1 [file 4277488]

data_Complex_1

_publ_contact_author_name
	'Trevor W. Hayton'
_publ_contact_author_email
	'hayton@chem.ucsb.edu'
loop_
	_publ_author_name
		'Skye Fortier'
		'Guang Wu'
		'Trevor W. Hayton'
_journal_full_name
	'Journal of the American Chemical Society'
  
 
_audit_creation_method            SHELXL-97 
_chemical_name_systematic 
; 
 ? 
; 
_chemical_name_common             ? 
_chemical_melting_point           ? 
_chemical_formula_moiety          ? 
_chemical_formula_sum 
 'C80 H172 Li2 O8 Si12 U2' 
_chemical_formula_weight          2089.20 
 
loop_ 
 _atom_type_symbol 
 _atom_type_description 
 _atom_type_scat_dispersion_real 
 _atom_type_scat_dispersion_imag 
 _atom_type_scat_source 
 'C'  'C'   0.0033   0.0016 
 'International Tables Vol C Tables 4.2.6.8 and 6.1.1.4' 
 'H'  'H'   0.0000   0.0000 
 'International Tables Vol C Tables 4.2.6.8 and 6.1.1.4' 
 'Li'  'Li'  -0.0003   0.0001 
 'International Tables Vol C Tables 4.2.6.8 and 6.1.1.4' 
 'O'  'O'   0.0106   0.0060 
 'International Tables Vol C Tables 4.2.6.8 and 6.1.1.4' 
 'Si'  'Si'   0.0817   0.0704 
 'International Tables Vol C Tables 4.2.6.8 and 6.1.1.4' 
 'U'  'U'  -9.6767   9.6646 
 'International Tables Vol C Tables 4.2.6.8 and 6.1.1.4' 
 
_symmetry_cell_setting            Monoclinic
_symmetry_space_group_name_H-M    P2(1)/c
 
loop_ 
 _symmetry_equiv_pos_as_xyz 
 'x, y, z' 
 '-x, y+1/2, -z+1/2' 
 '-x, -y, -z' 
 'x, -y-1/2, z-1/2' 
 
_cell_length_a                    22.3130(14) 
_cell_length_b                    13.3374(8) 
_cell_length_c                    19.3698(12) 
_cell_angle_alpha                 90.00 
_cell_angle_beta                  90.352(2) 
_cell_angle_gamma                 90.00 
_cell_volume                      5764.3(6) 
_cell_formula_units_Z             2 
_cell_measurement_temperature     150(2) 
_cell_measurement_reflns_used     ? 
_cell_measurement_theta_min       ? 
_cell_measurement_theta_max       ? 
 
_exptl_crystal_description        plate 
_exptl_crystal_colour             dark_green
_exptl_crystal_size_max           0.55 
_exptl_crystal_size_mid           0.55 
_exptl_crystal_size_min           0.12 
_exptl_crystal_density_meas       ? 
_exptl_crystal_density_diffrn     1.204 
_exptl_crystal_density_method     'not measured' 
_exptl_crystal_F_000              2148 
_exptl_absorpt_coefficient_mu     2.970 
_exptl_absorpt_correction_type    'Empirical'
_exptl_absorpt_correction_T_min   0.199
_exptl_absorpt_correction_T_max   0.332
_exptl_absorpt_process_details    'Psi Scan' 
 
_exptl_special_details 
; 
 ? 
; 
 
_diffrn_ambient_temperature       150(2) 
_diffrn_radiation_wavelength      0.71073 
_diffrn_radiation_type            MoK\a 
_diffrn_radiation_source          'fine-focus sealed tube' 
_diffrn_radiation_monochromator   graphite 
_diffrn_measurement_device_type   'CCD area detector' 
_diffrn_measurement_method        'omega scan'
_diffrn_detector_area_resol_mean  ? 
_diffrn_standards_number          ? 
_diffrn_standards_interval_count  ? 
_diffrn_standards_interval_time   ? 
_diffrn_standards_decay_%         ? 
_diffrn_reflns_number             46869 
_diffrn_reflns_av_R_equivalents   0.1224 
_diffrn_reflns_av_sigmaI/netI     0.0950 
_diffrn_reflns_limit_h_min        -27 
_diffrn_reflns_limit_h_max        27 
_diffrn_reflns_limit_k_min        -16 
_diffrn_reflns_limit_k_max        15 
_diffrn_reflns_limit_l_min        -23 
_diffrn_reflns_limit_l_max        24 
_diffrn_reflns_theta_min          0.91 
_diffrn_reflns_theta_max          26.37 
_reflns_number_total              11646 
_reflns_number_gt                 4808 
_reflns_threshold_expression      >2sigma(I) 
 
_computing_data_collection        ? 
_computing_cell_refinement        ? 
_computing_data_reduction         ? 
_computing_structure_solution     'SHELXS-97 (Sheldrick, 1990)' 
_computing_structure_refinement   'SHELXL-97 (Sheldrick, 1997)' 
_computing_molecular_graphics     ? 
_computing_publication_material   ? 
 
_refine_special_details 
; 
 Refinement of F^2^ against ALL reflections.  The weighted R-factor wR and 
 goodness of fit S are based on F^2^, conventional R-factors R are based 
 on F, with F set to zero for negative F^2^. The threshold expression of 
 F^2^ > 2sigma(F^2^) is used only for calculating R-factors(gt) etc. and is 
 not relevant to the choice of reflections for refinement.  R-factors based 
 on F^2^ are statistically about twice as large as those based on F, and R- 
 factors based on ALL data will be even larger. 
; 
 
_refine_ls_structure_factor_coef  Fsqd  
_refine_ls_matrix_type            full 
_refine_ls_weighting_scheme       calc  
_refine_ls_weighting_details 
 'calc w=1/[\s^2^(Fo^2^)+(0.0669P)^2^+0.0000P] where P=(Fo^2^+2Fc^2^)/3' 
_atom_sites_solution_primary      direct 
_atom_sites_solution_secondary    difmap 
_atom_sites_solution_hydrogens    geom 
_refine_ls_hydrogen_treatment     constr 
_refine_ls_extinction_method      none 
_refine_ls_extinction_coef        ? 
_refine_ls_number_reflns          11646 
_refine_ls_number_parameters      542 
_refine_ls_number_restraints      0 
_refine_ls_R_factor_all           0.1234 
_refine_ls_R_factor_gt            0.0456 
_refine_ls_wR_factor_ref          0.1474 
_refine_ls_wR_factor_gt           0.1196 
_refine_ls_goodness_of_fit_ref    0.924 
_refine_ls_restrained_S_all       0.924 
_refine_ls_shift/su_max           0.001 
_refine_ls_shift/su_mean          0.000 
 
loop_ 
 _atom_site_label 
 _atom_site_type_symbol 
 _atom_site_fract_x 
 _atom_site_fract_y 
 _atom_site_fract_z 
 _atom_site_U_iso_or_equiv 
 _atom_site_adp_type 
 _atom_site_occupancy 
 _atom_site_symmetry_multiplicity 
 _atom_site_calc_flag 
 _atom_site_refinement_flags 
 _atom_site_disorder_assembly 
 _atom_site_disorder_group 
U1 U 0.0000 0.0000 0.0000 0.03032(12) Uani 1 2 d S . . 
U2 U 0.5000 1.0000 0.0000 0.03089(12) Uani 1 2 d S . . 
C1 C 0.0920(3) 0.0408(6) 0.0615(4) 0.049(2) Uani 1 1 d . . . 
H1A H 0.0948 0.1127 0.0550 0.058 Uiso 1 1 calc R . . 
H1B H 0.0804 0.0324 0.1094 0.058 Uiso 1 1 calc R . . 
C2 C -0.0374(3) 0.1659(5) 0.0243(4) 0.046(2) Uani 1 1 d . . . 
H2A H -0.0781 0.1633 0.0065 0.055 Uiso 1 1 calc R . . 
H2B H -0.0415 0.1654 0.0741 0.055 Uiso 1 1 calc R . . 
C3 C -0.0477(3) -0.0500(6) 0.1083(3) 0.0382(19) Uani 1 1 d . . . 
H3A H -0.0891 -0.0292 0.1029 0.046 Uiso 1 1 calc R . . 
H3B H -0.0483 -0.1227 0.1065 0.046 Uiso 1 1 calc R . . 
C4 C 0.1800(4) -0.1341(7) 0.0829(5) 0.092(4) Uani 1 1 d . . . 
H4A H 0.1586 -0.1499 0.1244 0.138 Uiso 1 1 calc R . . 
H4B H 0.2217 -0.1494 0.0893 0.138 Uiso 1 1 calc R . . 
H4C H 0.1643 -0.1731 0.0453 0.138 Uiso 1 1 calc R . . 
C5 C 0.2147(4) 0.0717(8) 0.1310(5) 0.090(3) Uani 1 1 d . . . 
H5A H 0.2259 0.1364 0.1137 0.136 Uiso 1 1 calc R . . 
H5B H 0.2502 0.0344 0.1427 0.136 Uiso 1 1 calc R . . 
H5C H 0.1904 0.0796 0.1713 0.136 Uiso 1 1 calc R . . 
C6 C 0.2098(4) 0.0260(8) -0.0215(5) 0.097(4) Uani 1 1 d . . . 
H6A H 0.1896 -0.0102 -0.0576 0.146 Uiso 1 1 calc R . . 
H6B H 0.2507 0.0038 -0.0185 0.146 Uiso 1 1 calc R . . 
H6C H 0.2089 0.0964 -0.0317 0.146 Uiso 1 1 calc R . . 
C7 C 0.0659(4) 0.3227(6) 0.0308(5) 0.077(3) Uani 1 1 d . . . 
H7A H 0.0714 0.3117 0.0794 0.115 Uiso 1 1 calc R . . 
H7B H 0.0756 0.3911 0.0199 0.115 Uiso 1 1 calc R . . 
H7C H 0.0918 0.2786 0.0055 0.115 Uiso 1 1 calc R . . 
C8 C -0.0258(4) 0.3286(6) -0.0872(4) 0.060(3) Uani 1 1 d . . . 
H8A H 0.0041 0.2951 -0.1142 0.091 Uiso 1 1 calc R . . 
H8B H -0.0222 0.3998 -0.0934 0.091 Uiso 1 1 calc R . . 
H8C H -0.0649 0.3072 -0.1019 0.091 Uiso 1 1 calc R . . 
C9 C -0.0615(4) 0.3910(6) 0.0554(4) 0.068(3) Uani 1 1 d . . . 
H9A H -0.1032 0.3779 0.0473 0.102 Uiso 1 1 calc R . . 
H9B H -0.0520 0.4575 0.0400 0.102 Uiso 1 1 calc R . . 
H9C H -0.0529 0.3854 0.1039 0.102 Uiso 1 1 calc R . . 
C10 C -0.0108(4) 0.1136(6) 0.2137(4) 0.059(2) Uani 1 1 d . . . 
H10A H 0.0246 0.1307 0.1884 0.089 Uiso 1 1 calc R . . 
H10B H -0.0039 0.1244 0.2621 0.089 Uiso 1 1 calc R . . 
H10C H -0.0435 0.1549 0.1984 0.089 Uiso 1 1 calc R . . 
C11 C 0.0349(4) -0.1001(7) 0.2286(4) 0.079(3) Uani 1 1 d . . . 
H11A H 0.0243 -0.1697 0.2251 0.119 Uiso 1 1 calc R . . 
H11B H 0.0442 -0.0842 0.2758 0.119 Uiso 1 1 calc R . . 
H11C H 0.0692 -0.0868 0.2004 0.119 Uiso 1 1 calc R . . 
C12 C -0.0923(4) -0.0502(7) 0.2601(4) 0.076(3) Uani 1 1 d . . . 
H12A H -0.1282 -0.0172 0.2449 0.113 Uiso 1 1 calc R . . 
H12B H -0.0817 -0.0269 0.3054 0.113 Uiso 1 1 calc R . . 
H12C H -0.0988 -0.1213 0.2614 0.113 Uiso 1 1 calc R . . 
C13 C 0.5875(3) 0.9996(6) 0.0755(4) 0.047(2) Uani 1 1 d . . . 
C17 C 0.4120(5) 1.3447(8) 0.0983(6) 0.100(4) Uani 1 1 d . . . 
C19 C 0.6791(4) 0.9799(8) 0.1967(5) 0.095(4) Uani 1 1 d . . . 
C23 C 0.3902(5) 1.1706(9) 0.1904(7) 0.127(5) Uani 1 1 d . . . 
C24 C 0.4473(7) 0.6761(10) 0.1053(6) 0.212(10) Uani 1 1 d . . . 
H24A H 0.4691 0.6570 0.0648 0.318 Uiso 1 1 calc R . . 
H24B H 0.4211 0.6224 0.1186 0.318 Uiso 1 1 calc R . . 
H24C H 0.4749 0.6901 0.1422 0.318 Uiso 1 1 calc R . . 
C25 C 0.3533(4) 0.7631(7) 0.0104(4) 0.085(3) Uani 1 1 d . . . 
H25A H 0.3772 0.7463 -0.0289 0.127 Uiso 1 1 calc R . . 
H25B H 0.3303 0.8223 0.0006 0.127 Uiso 1 1 calc R . . 
H25C H 0.3266 0.7086 0.0204 0.127 Uiso 1 1 calc R . . 
C26 C 0.3561(5) 0.7977(11) 0.1625(6) 0.159(7) Uani 1 1 d . . . 
H26A H 0.3247 0.7486 0.1600 0.239 Uiso 1 1 calc R . . 
H26B H 0.3389 0.8636 0.1639 0.239 Uiso 1 1 calc R . . 
H26C H 0.3797 0.7866 0.2034 0.239 Uiso 1 1 calc R . . 
C27 C 0.3716(5) 1.0114(7) 0.4412(6) 0.099(4) Uani 1 1 d . . . 
H27A H 0.3647 0.9846 0.4870 0.118 Uiso 1 1 calc R . . 
H27B H 0.3710 1.0840 0.4435 0.118 Uiso 1 1 calc R . . 
C28 C 0.4285(6) 0.9760(11) 0.4141(9) 0.141(6) Uani 1 1 d . . . 
H28A H 0.4600 1.0239 0.4244 0.169 Uiso 1 1 calc R . . 
H28B H 0.4391 0.9123 0.4351 0.169 Uiso 1 1 calc R . . 
C29 C 0.4221(6) 0.9647(14) 0.3422(7) 0.194(9) Uani 1 1 d . . . 
H29A H 0.4478 0.9117 0.3250 0.233 Uiso 1 1 calc R . . 
H29B H 0.4314 1.0266 0.3182 0.233 Uiso 1 1 calc R . . 
C30 C 0.3561(5) 0.9372(9) 0.3339(5) 0.094(4) Uani 1 1 d . . . 
H30A H 0.3396 0.9673 0.2923 0.113 Uiso 1 1 calc R . . 
H30B H 0.3513 0.8651 0.3310 0.113 Uiso 1 1 calc R . . 
C31 C 0.2166(5) 0.7504(7) 0.3869(5) 0.085(3) Uani 1 1 d . . . 
H31A H 0.1957 0.7480 0.4307 0.103 Uiso 1 1 calc R . . 
H31B H 0.2576 0.7288 0.3946 0.103 Uiso 1 1 calc R . . 
C32 C 0.1875(5) 0.6844(8) 0.3376(6) 0.103(4) Uani 1 1 d . . . 
H32A H 0.1461 0.6724 0.3501 0.124 Uiso 1 1 calc R . . 
H32B H 0.2082 0.6207 0.3345 0.124 Uiso 1 1 calc R . . 
C33 C 0.1913(5) 0.7404(7) 0.2716(5) 0.082(3) Uani 1 1 d . . . 
H33A H 0.2257 0.7185 0.2452 0.098 Uiso 1 1 calc R . . 
H33B H 0.1554 0.7304 0.2441 0.098 Uiso 1 1 calc R . . 
C34 C 0.1975(5) 0.8459(7) 0.2914(5) 0.081(3) Uani 1 1 d . . . 
H34A H 0.2270 0.8785 0.2623 0.097 Uiso 1 1 calc R . . 
H34B H 0.1595 0.8803 0.2856 0.097 Uiso 1 1 calc R . . 
C35 C 0.1483(4) 1.1014(7) 0.3483(5) 0.084(3) Uani 1 1 d . . . 
H35A H 0.1286 1.0925 0.3924 0.100 Uiso 1 1 calc R . . 
H35B H 0.1298 1.0567 0.3149 0.100 Uiso 1 1 calc R . . 
C36 C 0.1429(5) 1.2046(9) 0.3256(8) 0.147(6) Uani 1 1 d . . . 
H36A H 0.1164 1.2084 0.2857 0.177 Uiso 1 1 calc R . . 
H36B H 0.1259 1.2453 0.3621 0.177 Uiso 1 1 calc R . . 
C37 C 0.2010(5) 1.2415(7) 0.3079(6) 0.098(4) Uani 1 1 d . . . 
H37A H 0.2090 1.3048 0.3309 0.118 Uiso 1 1 calc R . . 
H37B H 0.2043 1.2511 0.2585 0.118 Uiso 1 1 calc R . . 
C38 C 0.2426(5) 1.1642(7) 0.3318(5) 0.085(3) Uani 1 1 d . . . 
H38A H 0.2689 1.1445 0.2944 0.103 Uiso 1 1 calc R . . 
H38B H 0.2671 1.1900 0.3693 0.103 Uiso 1 1 calc R . . 
C39 C 0.2293(5) 1.0889(7) 0.5312(5) 0.081(3) Uani 1 1 d . . . 
H39A H 0.1967 1.1305 0.5145 0.097 Uiso 1 1 calc R . . 
H39B H 0.2669 1.1199 0.5180 0.097 Uiso 1 1 calc R . . 
C40 C 0.2263(5) 1.0794(8) 0.6079(5) 0.089(4) Uani 1 1 d . . . 
H40A H 0.2587 1.1162 0.6300 0.106 Uiso 1 1 calc R . . 
H40B H 0.1883 1.1039 0.6251 0.106 Uiso 1 1 calc R . . 
C41 C 0.2326(6) 0.9696(8) 0.6200(5) 0.099(4) Uani 1 1 d . . . 
H41A H 0.2739 0.9526 0.6305 0.119 Uiso 1 1 calc R . . 
H41B H 0.2076 0.9484 0.6581 0.119 Uiso 1 1 calc R . . 
C42 C 0.2133(6) 0.9217(7) 0.5556(5) 0.099(4) Uani 1 1 d . . . 
H42A H 0.2354 0.8601 0.5481 0.118 Uiso 1 1 calc R . . 
H42B H 0.1708 0.9060 0.5572 0.118 Uiso 1 1 calc R . . 
C14A C 0.4740(8) 1.1676(11) 0.0469(9) 0.036(5) Uani 0.50 1 d P . . 
C15A C 0.4379(4) 0.9155(8) 0.0867(5) 0.031(3) Uani 0.662(15) 1 d P . . 
C18A C 0.3365(5) 1.1945(10) 0.0334(7) 0.071(4) Uani 0.663(6) 1 d P . . 
C20A C 0.6190(14) 0.8123(15) 0.1407(18) 0.36(3) Uani 0.686(14) 1 d P . . 
C21A C 0.5480(5) 0.9715(16) 0.2238(5) 0.213(11) Uani 1 1 d . . . 
C14B C 0.4467(14) 1.091(3) 0.0825(16) 0.23(2) Uani 0.50 1 d P . . 
C15B C 0.4698(10) 0.8362(18) 0.0426(10) 0.044(9) Uani 0.338(15) 1 d P . . 
C18B C 0.5141(10) 1.2317(19) 0.1684(13) 0.062(8) Uani 0.337(6) 1 d P . . 
C20B C 0.6068(15) 1.1604(17) 0.1777(12) 0.071(12) Uani 0.314(14) 1 d P . . 
Li1 Li 0.2457(8) 0.9701(12) 0.4064(8) 0.062(4) Uani 1 1 d . . . 
O1 O 0.3270(3) 0.9751(5) 0.3929(3) 0.0685(18) Uani 1 1 d . . . 
O2 O 0.2160(2) 0.8496(4) 0.3608(3) 0.0521(15) Uani 1 1 d . . . 
O3 O 0.2095(3) 1.0805(4) 0.3547(3) 0.0610(16) Uani 1 1 d . . . 
O4 O 0.2250(3) 0.9916(4) 0.5024(3) 0.0604(16) Uani 1 1 d . . . 
Si6A Si 0.40347(12) 0.78663(18) 0.08700(13) 0.0532(7) Uani 1 1 d . . . 
Si1 Si 0.17123(10) 0.0023(2) 0.06301(11) 0.0581(7) Uani 1 1 d . . . 
Si2 Si -0.01481(11) 0.29688(16) 0.00623(10) 0.0440(6) Uani 1 1 d . . . 
Si3 Si -0.02967(10) -0.02122(17) 0.19855(10) 0.0446(6) Uani 1 1 d . . . 
Si4A Si 0.6083(3) 0.9411(5) 0.1551(3) 0.063(2) Uani 0.50 1 d P . . 
Si5A Si 0.40528(16) 1.2148(2) 0.08956(17) 0.0377(12) Uani 0.663(6) 1 d P . . 
Si4B Si 0.6035(3) 1.0091(5) 0.1659(3) 0.062(2) Uani 0.50 1 d P . . 
Si5B Si 0.4390(3) 1.1973(5) 0.1354(4) 0.043(2) Uani 0.337(6) 1 d P . . 
 
loop_ 
 _atom_site_aniso_label 
 _atom_site_aniso_U_11 
 _atom_site_aniso_U_22 
 _atom_site_aniso_U_33 
 _atom_site_aniso_U_23 
 _atom_site_aniso_U_13 
 _atom_site_aniso_U_12 
U1 0.0378(2) 0.0317(2) 0.02153(18) 0.0029(2) 0.00307(14) 0.0072(2) 
U2 0.0391(2) 0.0271(2) 0.02652(19) -0.0008(2) 0.00422(15) 0.0017(2) 
C1 0.065(6) 0.040(5) 0.040(5) 0.002(4) 0.006(4) 0.012(4) 
C2 0.050(5) 0.057(6) 0.030(4) 0.012(4) 0.002(4) 0.014(4) 
C3 0.046(5) 0.040(5) 0.029(4) 0.006(4) 0.001(3) 0.009(4) 
C4 0.072(7) 0.109(9) 0.095(8) -0.013(7) -0.028(6) 0.052(7) 
C5 0.071(7) 0.124(10) 0.076(7) -0.022(7) -0.006(6) 0.004(7) 
C6 0.055(6) 0.180(12) 0.058(6) -0.013(7) 0.013(5) -0.008(7) 
C7 0.066(7) 0.060(6) 0.103(8) 0.007(6) -0.027(6) -0.024(5) 
C8 0.094(7) 0.046(6) 0.042(5) 0.012(4) 0.012(5) 0.003(5) 
C9 0.097(8) 0.055(6) 0.053(6) -0.004(5) 0.005(5) 0.006(6) 
C10 0.077(7) 0.057(6) 0.044(5) -0.010(4) 0.006(5) -0.002(5) 
C11 0.122(9) 0.067(7) 0.048(5) 0.006(5) -0.021(6) 0.001(6) 
C12 0.097(8) 0.095(8) 0.035(5) -0.010(5) 0.018(5) -0.032(6) 
C13 0.052(5) 0.059(6) 0.030(4) -0.005(4) -0.002(3) 0.011(5) 
C17 0.069(8) 0.116(10) 0.116(9) 0.051(7) -0.002(7) 0.015(7) 
C19 0.051(6) 0.162(12) 0.072(7) 0.021(7) -0.023(5) -0.010(7) 
C23 0.095(10) 0.119(11) 0.168(12) 0.097(9) 0.013(9) -0.001(8) 
C24 0.37(3) 0.170(14) 0.092(10) -0.006(9) 0.002(13) 0.207(16) 
C25 0.095(8) 0.099(9) 0.062(6) -0.012(6) 0.022(6) -0.031(7) 
C26 0.114(11) 0.262(18) 0.102(10) -0.083(11) -0.014(8) 0.090(12) 
C27 0.082(8) 0.074(8) 0.139(10) -0.025(7) -0.041(7) -0.014(7) 
C28 0.066(9) 0.181(16) 0.176(16) -0.003(12) -0.008(10) -0.021(10) 
C29 0.072(10) 0.42(3) 0.090(10) 0.081(14) 0.021(8) -0.007(13) 
C30 0.071(8) 0.146(11) 0.064(7) -0.006(7) 0.008(6) -0.001(8) 
C31 0.123(10) 0.078(8) 0.055(6) 0.006(6) -0.014(6) -0.009(7) 
C32 0.116(11) 0.091(9) 0.103(10) -0.007(8) -0.028(8) -0.013(8) 
C33 0.127(10) 0.054(7) 0.065(7) -0.001(6) -0.003(6) -0.022(6) 
C34 0.120(10) 0.056(7) 0.066(7) 0.003(5) -0.027(6) 0.010(6) 
C35 0.067(7) 0.062(7) 0.122(9) 0.020(6) 0.026(7) 0.015(6) 
C36 0.087(10) 0.091(10) 0.264(17) 0.101(11) 0.063(11) 0.034(8) 
C37 0.092(9) 0.050(7) 0.154(11) 0.025(7) 0.002(8) 0.002(7) 
C38 0.078(8) 0.073(8) 0.105(9) 0.030(7) -0.013(6) -0.019(7) 
C39 0.116(9) 0.053(7) 0.075(7) -0.010(6) 0.005(7) -0.002(6) 
C40 0.112(10) 0.092(9) 0.063(7) -0.013(7) 0.022(6) -0.028(8) 
C41 0.138(12) 0.101(10) 0.058(7) 0.011(7) 0.007(7) 0.024(9) 
C42 0.164(12) 0.064(8) 0.068(7) 0.015(6) -0.023(8) -0.029(8) 
C14A 0.039(11) 0.011(8) 0.060(12) -0.003(7) 0.023(9) -0.009(7) 
C15A 0.030(6) 0.038(7) 0.027(6) -0.004(5) 0.014(5) -0.007(5) 
C18A 0.045(8) 0.066(10) 0.101(11) -0.034(8) -0.024(8) 0.017(7) 
C20A 0.42(5) 0.086(17) 0.56(6) 0.16(2) -0.41(4) -0.11(2) 
C21A 0.053(7) 0.54(3) 0.041(6) 0.060(12) 0.007(5) 0.040(13) 
C14B 0.15(3) 0.40(6) 0.15(3) -0.21(3) -0.12(2) 0.20(3) 
C15B 0.033(15) 0.08(2) 0.023(12) 0.011(12) -0.006(10) -0.012(13) 
C18B 0.037(15) 0.068(19) 0.080(19) -0.031(15) -0.003(13) -0.003(13) 
C20B 0.16(3) 0.025(16) 0.029(14) -0.006(11) -0.036(17) -0.023(17) 
Li1 0.074(11) 0.065(11) 0.048(9) -0.016(8) 0.008(8) 0.009(9) 
O1 0.059(4) 0.084(5) 0.062(4) -0.009(3) -0.005(3) -0.005(4) 
O2 0.069(4) 0.046(4) 0.041(3) 0.000(3) -0.010(3) -0.001(3) 
O3 0.062(4) 0.054(4) 0.067(4) 0.012(3) 0.005(3) 0.000(4) 
O4 0.091(4) 0.052(4) 0.039(3) 0.005(3) 0.001(3) -0.016(4) 
Si6A 0.0553(17) 0.0432(16) 0.0611(17) 0.0184(13) 0.0121(13) -0.0022(14) 
Si1 0.0418(13) 0.093(2) 0.0394(12) -0.0152(15) -0.0042(9) 0.0147(16) 
Si2 0.0692(19) 0.0303(12) 0.0326(12) 0.0038(10) -0.0037(12) 0.0007(11) 
Si3 0.0547(14) 0.0589(18) 0.0202(9) -0.0020(10) 0.0027(9) -0.0043(12) 
Si4A 0.053(4) 0.084(6) 0.053(4) 0.032(4) -0.008(3) 0.000(4) 
Si5A 0.038(2) 0.038(2) 0.037(2) -0.0078(16) 0.0083(17) 0.0055(17) 
Si4B 0.049(3) 0.111(7) 0.026(2) -0.005(4) -0.001(2) -0.002(4) 
Si5B 0.050(5) 0.027(4) 0.051(5) -0.010(3) 0.007(4) 0.006(3) 
 
_geom_special_details 
; 
 All esds (except the esd in the dihedral angle between two l.s. planes) 
 are estimated using the full covariance matrix.  The cell esds are taken 
 into account individually in the estimation of esds in distances, angles 
 and torsion angles; correlations between esds in cell parameters are only 
 used when they are defined by crystal symmetry.  An approximate (isotropic) 
 treatment of cell esds is used for estimating esds involving l.s. planes. 
; 
 
loop_ 
 _geom_bond_atom_site_label_1 
 _geom_bond_atom_site_label_2 
 _geom_bond_distance 
 _geom_bond_site_symmetry_2 
 _geom_bond_publ_flag 
U1 C2 2.413(7) . ? 
U1 C2 2.413(7) 3 ? 
U1 C1 2.429(8) . ? 
U1 C1 2.429(8) 3 ? 
U1 C3 2.451(6) 3 ? 
U1 C3 2.451(6) . ? 
U2 C14B 2.34(2) . ? 
U2 C14B 2.34(2) 3_675 ? 
U2 C15B 2.43(2) 3_675 ? 
U2 C15B 2.43(2) . ? 
U2 C13 2.433(7) . ? 
U2 C13 2.433(7) 3_675 ? 
U2 C15A 2.458(9) 3_675 ? 
U2 C15A 2.458(9) . ? 
U2 C14A 2.483(16) 3_675 ? 
U2 C14A 2.483(16) . ? 
C1 Si1 1.842(8) . ? 
C2 Si2 1.852(7) . ? 
C3 Si3 1.831(7) . ? 
C4 Si1 1.870(9) . ? 
C5 Si1 1.875(9) . ? 
C6 Si1 1.882(9) . ? 
C7 Si2 1.893(8) . ? 
C8 Si2 1.873(7) . ? 
C9 Si2 1.892(8) . ? 
C10 Si3 1.869(8) . ? 
C11 Si3 1.873(9) . ? 
C12 Si3 1.882(8) . ? 
C13 Si4A 1.786(9) . ? 
C13 Si4B 1.788(9) . ? 
C17 Si5A 1.747(12) . ? 
C17 Si5B 2.177(12) . ? 
C19 Si4B 1.827(11) . ? 
C19 Si4A 1.843(11) . ? 
C23 Si5B 1.569(12) . ? 
C23 Si5A 2.071(12) . ? 
C24 Si6A 1.802(10) . ? 
C25 Si6A 1.880(9) . ? 
C26 Si6A 1.815(11) . ? 
C27 O1 1.444(10) . ? 
C27 C28 1.454(15) . ? 
C28 C29 1.407(16) . ? 
C29 C30 1.525(14) . ? 
C30 O1 1.412(10) . ? 
C31 O2 1.417(9) . ? 
C31 C32 1.450(12) . ? 
C32 C33 1.483(12) . ? 
C33 C34 1.463(11) . ? 
C34 O2 1.405(9) . ? 
C35 O3 1.398(10) . ? 
C35 C36 1.450(12) . ? 
C36 C37 1.431(13) . ? 
C37 C38 1.460(12) . ? 
C38 O3 1.411(9) . ? 
C39 O4 1.416(9) . ? 
C39 C40 1.492(12) . ? 
C40 C41 1.489(13) . ? 
C41 C42 1.464(12) . ? 
C42 O4 1.415(10) . ? 
C14A C14B 1.38(5) . ? 
C14A Si5A 1.857(17) . ? 
C14A Si5B 1.930(18) . ? 
C15A C15B 1.54(2) . ? 
C15A Si6A 1.882(10) . ? 
C18A Si5A 1.895(12) . ? 
C20A Si4A 1.76(3) . ? 
C21A Si4B 1.750(13) . ? 
C21A Si4A 1.941(14) . ? 
C14B Si5B 1.75(3) . ? 
C14B Si5A 1.89(3) . ? 
C15B Si6A 1.84(2) . ? 
C18B Si5B 1.85(2) . ? 
C20B Si4B 2.03(2) . ? 
Li1 O1 1.836(18) . ? 
Li1 O4 1.941(15) . ? 
Li1 O2 1.948(17) . ? 
Li1 O3 1.952(18) . ? 
 
loop_ 
 _geom_angle_atom_site_label_1 
 _geom_angle_atom_site_label_2 
 _geom_angle_atom_site_label_3 
 _geom_angle 
 _geom_angle_site_symmetry_1 
 _geom_angle_site_symmetry_3 
 _geom_angle_publ_flag 
C2 U1 C2 180.0(5) . 3 ? 
C2 U1 C1 89.5(3) . . ? 
C2 U1 C1 90.5(3) 3 . ? 
C2 U1 C1 90.5(3) . 3 ? 
C2 U1 C1 89.5(3) 3 3 ? 
C1 U1 C1 180.0(5) . 3 ? 
C2 U1 C3 94.0(2) . 3 ? 
C2 U1 C3 86.0(2) 3 3 ? 
C1 U1 C3 89.4(2) . 3 ? 
C1 U1 C3 90.6(2) 3 3 ? 
C2 U1 C3 86.0(2) . . ? 
C2 U1 C3 94.0(2) 3 . ? 
C1 U1 C3 90.6(2) . . ? 
C1 U1 C3 89.4(2) 3 . ? 
C3 U1 C3 180.0(5) 3 . ? 
C14B U2 C14B 180.000(2) . 3_675 ? 
C14B U2 C15B 84.7(14) . 3_675 ? 
C14B U2 C15B 95.3(14) 3_675 3_675 ? 
C14B U2 C15B 95.3(14) . . ? 
C14B U2 C15B 84.7(14) 3_675 . ? 
C15B U2 C15B 180.000(2) 3_675 . ? 
C14B U2 C13 90.0(6) . . ? 
C14B U2 C13 90.0(6) 3_675 . ? 
C15B U2 C13 89.0(5) 3_675 . ? 
C15B U2 C13 91.0(5) . . ? 
C14B U2 C13 90.0(6) . 3_675 ? 
C14B U2 C13 90.0(6) 3_675 3_675 ? 
C15B U2 C13 91.0(5) 3_675 3_675 ? 
C15B U2 C13 89.0(5) . 3_675 ? 
C13 U2 C13 180.0(4) . 3_675 ? 
C14B U2 C15A 121.3(14) . 3_675 ? 
C14B U2 C15A 58.7(14) 3_675 3_675 ? 
C15B U2 C15A 36.6(6) 3_675 3_675 ? 
C15B U2 C15A 143.4(6) . 3_675 ? 
C13 U2 C15A 87.6(3) . 3_675 ? 
C13 U2 C15A 92.4(3) 3_675 3_675 ? 
C14B U2 C15A 58.7(14) . . ? 
C14B U2 C15A 121.3(14) 3_675 . ? 
C15B U2 C15A 143.4(6) 3_675 . ? 
C15B U2 C15A 36.6(6) . . ? 
C13 U2 C15A 92.4(3) . . ? 
C13 U2 C15A 87.6(3) 3_675 . ? 
C15A U2 C15A 180.000(1) 3_675 . ? 
C14B U2 C14A 147.0(13) . 3_675 ? 
C14B U2 C14A 33.0(13) 3_675 3_675 ? 
C15B U2 C14A 128.2(6) 3_675 3_675 ? 
C15B U2 C14A 51.8(6) . 3_675 ? 
C13 U2 C14A 91.7(5) . 3_675 ? 
C13 U2 C14A 88.3(5) 3_675 3_675 ? 
C15A U2 C14A 91.7(4) 3_675 3_675 ? 
C15A U2 C14A 88.3(4) . 3_675 ? 
C14B U2 C14A 33.0(13) . . ? 
C14B U2 C14A 147.0(13) 3_675 . ? 
C15B U2 C14A 51.8(6) 3_675 . ? 
C15B U2 C14A 128.2(6) . . ? 
C13 U2 C14A 88.3(5) . . ? 
C13 U2 C14A 91.7(5) 3_675 . ? 
C15A U2 C14A 88.3(4) 3_675 . ? 
C15A U2 C14A 91.7(4) . . ? 
C14A U2 C14A 180.000(1) 3_675 . ? 
Si1 C1 U1 138.9(4) . . ? 
Si2 C2 U1 137.1(4) . . ? 
Si3 C3 U1 131.8(4) . . ? 
Si4A C13 Si4B 30.4(3) . . ? 
Si4A C13 U2 136.3(5) . . ? 
Si4B C13 U2 138.0(5) . . ? 
Si5A C17 Si5B 32.8(3) . . ? 
Si4B C19 Si4A 29.6(3) . . ? 
Si5B C23 Si5A 34.6(4) . . ? 
O1 C27 C28 104.9(10) . . ? 
C29 C28 C27 108.0(12) . . ? 
C28 C29 C30 102.8(10) . . ? 
O1 C30 C29 106.1(9) . . ? 
O2 C31 C32 109.2(8) . . ? 
C31 C32 C33 103.5(9) . . ? 
C34 C33 C32 105.4(8) . . ? 
O2 C34 C33 108.1(7) . . ? 
O3 C35 C36 107.2(8) . . ? 
C37 C36 C35 108.9(9) . . ? 
C36 C37 C38 104.9(9) . . ? 
O3 C38 C37 109.0(8) . . ? 
O4 C39 C40 108.1(8) . . ? 
C41 C40 C39 103.6(8) . . ? 
C42 C41 C40 105.6(9) . . ? 
O4 C42 C41 106.1(8) . . ? 
C14B C14A Si5A 69.9(14) . . ? 
C14B C14A Si5B 61.4(13) . . ? 
Si5A C14A Si5B 36.3(4) . . ? 
C14B C14A U2 67.8(13) . . ? 
Si5A C14A U2 131.6(7) . . ? 
Si5B C14A U2 127.3(7) . . ? 
C15B C15A Si6A 64.1(9) . . ? 
C15B C15A U2 70.8(9) . . ? 
Si6A C15A U2 130.7(5) . . ? 
Si4B C21A Si4A 28.8(3) . . ? 
C14A C14B Si5B 75(2) . . ? 
C14A C14B Si5A 67(2) . . ? 
Si5B C14B Si5A 37.6(7) . . ? 
C14A C14B U2 79.2(17) . . ? 
Si5B C14B U2 150(3) . . ? 
Si5A C14B U2 139(2) . . ? 
C15A C15B Si6A 67.1(9) . . ? 
C15A C15B U2 72.6(10) . . ? 
Si6A C15B U2 135.0(12) . . ? 
O1 Li1 O4 111.8(9) . . ? 
O1 Li1 O2 107.4(8) . . ? 
O4 Li1 O2 118.3(9) . . ? 
O1 Li1 O3 107.9(9) . . ? 
O4 Li1 O3 106.3(8) . . ? 
O2 Li1 O3 104.5(8) . . ? 
C30 O1 C27 109.0(8) . . ? 
C30 O1 Li1 124.2(7) . . ? 
C27 O1 Li1 126.7(8) . . ? 
C34 O2 C31 108.1(6) . . ? 
C34 O2 Li1 124.1(7) . . ? 
C31 O2 Li1 127.3(7) . . ? 
C35 O3 C38 109.1(7) . . ? 
C35 O3 Li1 126.6(8) . . ? 
C38 O3 Li1 122.8(8) . . ? 
C42 O4 C39 109.2(7) . . ? 
C42 O4 Li1 130.3(8) . . ? 
C39 O4 Li1 119.8(8) . . ? 
C24 Si6A C26 103.0(6) . . ? 
C24 Si6A C15B 87.1(9) . . ? 
C26 Si6A C15B 145.2(8) . . ? 
C24 Si6A C25 109.8(6) . . ? 
C26 Si6A C25 107.6(5) . . ? 
C15B Si6A C25 99.7(7) . . ? 
C24 Si6A C15A 121.8(7) . . ? 
C26 Si6A C15A 99.7(6) . . ? 
C15B Si6A C15A 48.8(8) . . ? 
C25 Si6A C15A 113.0(4) . . ? 
C1 Si1 C4 112.0(4) . . ? 
C1 Si1 C5 111.5(4) . . ? 
C4 Si1 C5 106.4(4) . . ? 
C1 Si1 C6 112.6(4) . . ? 
C4 Si1 C6 107.2(4) . . ? 
C5 Si1 C6 106.9(4) . . ? 
C2 Si2 C8 111.2(3) . . ? 
C2 Si2 C9 112.3(4) . . ? 
C8 Si2 C9 105.5(4) . . ? 
C2 Si2 C7 112.6(4) . . ? 
C8 Si2 C7 108.7(4) . . ? 
C9 Si2 C7 106.2(4) . . ? 
C3 Si3 C10 113.5(3) . . ? 
C3 Si3 C11 110.0(4) . . ? 
C10 Si3 C11 108.6(4) . . ? 
C3 Si3 C12 113.7(4) . . ? 
C10 Si3 C12 105.4(4) . . ? 
C11 Si3 C12 105.1(4) . . ? 
C20A Si4A C13 109.0(10) . . ? 
C20A Si4A C19 103.1(9) . . ? 
C13 Si4A C19 118.1(5) . . ? 
C20A Si4A C21A 114.1(14) . . ? 
C13 Si4A C21A 108.9(6) . . ? 
C19 Si4A C21A 103.7(6) . . ? 
C17 Si5A C14A 108.0(6) . . ? 
C17 Si5A C14B 145.9(13) . . ? 
C14A Si5A C14B 43.0(15) . . ? 
C17 Si5A C18A 105.4(6) . . ? 
C14A Si5A C18A 111.4(7) . . ? 
C14B Si5A C18A 103.2(9) . . ? 
C17 Si5A C23 101.9(5) . . ? 
C14A Si5A C23 117.6(7) . . ? 
C14B Si5A C23 84.4(12) . . ? 
C18A Si5A C23 111.4(6) . . ? 
C21A Si4B C13 118.0(6) . . ? 
C21A Si4B C19 112.6(6) . . ? 
C13 Si4B C19 118.9(5) . . ? 
C21A Si4B C20B 103.8(11) . . ? 
C13 Si4B C20B 100.8(7) . . ? 
C19 Si4B C20B 98.2(10) . . ? 
C23 Si5B C14B 106.5(18) . . ? 
C23 Si5B C18B 116.9(10) . . ? 
C14B Si5B C18B 108.1(12) . . ? 
C23 Si5B C14A 147.6(8) . . ? 
C14B Si5B C14A 43.5(17) . . ? 
C18B Si5B C14A 89.2(10) . . ? 
C23 Si5B C17 103.8(6) . . ? 
C14B Si5B C17 124.3(14) . . ? 
C18B Si5B C17 97.9(9) . . ? 
C14A Si5B C17 90.3(6) . . ? 
 
_diffrn_measured_fraction_theta_max    0.987 
_diffrn_reflns_theta_full              26.37 
_diffrn_measured_fraction_theta_full   0.987 
_refine_diff_density_max    1.936 
_refine_diff_density_min   -1.296 
_refine_diff_density_rms    0.135 


###########################################################END###########################################################


 
data_Complex_2
 
_audit_creation_method            SHELXL-97 
_chemical_name_systematic 
; 
 ? 
; 
_chemical_name_common             ? 
_chemical_melting_point           ? 
_chemical_formula_moiety          ? 
_chemical_formula_sum 
 'C32 H40 Li O8 Si3 U' 
_chemical_formula_weight          881.88 
 
loop_ 
 _atom_type_symbol 
 _atom_type_description 
 _atom_type_scat_dispersion_real 
 _atom_type_scat_dispersion_imag 
 _atom_type_scat_source 
 'C'  'C'   0.0033   0.0016 
 'International Tables Vol C Tables 4.2.6.8 and 6.1.1.4' 
 'H'  'H'   0.0000   0.0000 
 'International Tables Vol C Tables 4.2.6.8 and 6.1.1.4' 
 'Li'  'Li'  -0.0003   0.0001 
 'International Tables Vol C Tables 4.2.6.8 and 6.1.1.4' 
 'O'  'O'   0.0106   0.0060 
 'International Tables Vol C Tables 4.2.6.8 and 6.1.1.4' 
 'Si'  'Si'   0.0817   0.0704 
 'International Tables Vol C Tables 4.2.6.8 and 6.1.1.4' 
 'U'  'U'  -9.6767   9.6646 
 'International Tables Vol C Tables 4.2.6.8 and 6.1.1.4' 
 
_symmetry_cell_setting            Trigonal 
_symmetry_space_group_name_H-M    P-31c 
 
loop_ 
 _symmetry_equiv_pos_as_xyz 
 'x, y, z' 
 '-y, x-y, z' 
 '-x+y, -x, z' 
 '-y, -x, -z+1/2' 
 '-x+y, y, -z+1/2' 
 'x, x-y, -z+1/2' 
 '-x, -y, -z' 
 'y, -x+y, -z' 
 'x-y, x, -z' 
 'y, x, z-1/2' 
 'x-y, -y, z-1/2' 
 '-x, -x+y, z-1/2' 
 
_cell_length_a                    13.0591(16) 
_cell_length_b                    13.0591(16) 
_cell_length_c                    16.136(4) 
_cell_angle_alpha                 90.00 
_cell_angle_beta                  90.00 
_cell_angle_gamma                 120.00 
_cell_volume                      2383.2(7) 
_cell_formula_units_Z             2 
_cell_measurement_temperature     150(2) 
_cell_measurement_reflns_used     ? 
_cell_measurement_theta_min       ? 
_cell_measurement_theta_max       ? 
 
_exptl_crystal_description        plate 
_exptl_crystal_colour             pink 
_exptl_crystal_size_max           0.7 
_exptl_crystal_size_mid           0.7 
_exptl_crystal_size_min           0.07 
_exptl_crystal_density_meas       ? 
_exptl_crystal_density_diffrn     1.229 
_exptl_crystal_density_method     'not measured' 
_exptl_crystal_F_000              866 
_exptl_absorpt_coefficient_mu     3.515 
_exptl_absorpt_correction_type    'Empirical'
_exptl_absorpt_correction_T_min   0.416551 
_exptl_absorpt_correction_T_max   1.000 
_exptl_absorpt_process_details    'SADABS' 
 
_exptl_special_details 
; 
 ? 
; 
 
_diffrn_ambient_temperature       150(2) 
_diffrn_radiation_wavelength      0.71073 
_diffrn_radiation_type            MoK\a 
_diffrn_radiation_source          'fine-focus sealed tube' 
_diffrn_radiation_monochromator   graphite 
_diffrn_measurement_device_type   'CCD area detector'
_diffrn_measurement_method        'omega scan'
_diffrn_detector_area_resol_mean  ? 
_diffrn_standards_number          ? 
_diffrn_standards_interval_count  ? 
_diffrn_standards_interval_time   ? 
_diffrn_standards_decay_%         ? 
_diffrn_reflns_number             16705 
_diffrn_reflns_av_R_equivalents   0.0776 
_diffrn_reflns_av_sigmaI/netI     0.0396 
_diffrn_reflns_limit_h_min        -16 
_diffrn_reflns_limit_h_max        15 
_diffrn_reflns_limit_k_min        -16 
_diffrn_reflns_limit_k_max        16 
_diffrn_reflns_limit_l_min        -20 
_diffrn_reflns_limit_l_max        19 
_diffrn_reflns_theta_min          1.80 
_diffrn_reflns_theta_max          27.42 
_reflns_number_total              1757 
_reflns_number_gt                 1527 
_reflns_threshold_expression      >2sigma(I) 
 
_computing_data_collection        ? 
_computing_cell_refinement        ? 
_computing_data_reduction         ? 
_computing_structure_solution     'SHELXS-97 (Sheldrick, 1990)' 
_computing_structure_refinement   'SHELXL-97 (Sheldrick, 1997)' 
_computing_molecular_graphics     ? 
_computing_publication_material   ? 
 
_refine_special_details 
; 
 Refinement of F^2^ against ALL reflections.  The weighted R-factor wR and 
 goodness of fit S are based on F^2^, conventional R-factors R are based 
 on F, with F set to zero for negative F^2^. The threshold expression of 
 F^2^ > 2sigma(F^2^) is used only for calculating R-factors(gt) etc. and is 
 not relevant to the choice of reflections for refinement.  R-factors based 
 on F^2^ are statistically about twice as large as those based on F, and R- 
 factors based on ALL data will be even larger. 
; 
 
_refine_ls_structure_factor_coef  Fsqd  
_refine_ls_matrix_type            full 
_refine_ls_weighting_scheme       calc  
_refine_ls_weighting_details 
 'calc w=1/[\s^2^(Fo^2^)+(0.0479P)^2^+2.8623P] where P=(Fo^2^+2Fc^2^)/3' 
_atom_sites_solution_primary      direct 
_atom_sites_solution_secondary    difmap 
_atom_sites_solution_hydrogens    geom 
_refine_ls_hydrogen_treatment     constr 
_refine_ls_extinction_method      none 
_refine_ls_extinction_coef        ? 
_refine_ls_number_reflns          1757 
_refine_ls_number_parameters      96 
_refine_ls_number_restraints      5 
_refine_ls_R_factor_all           0.0419 
_refine_ls_R_factor_gt            0.0355 
_refine_ls_wR_factor_ref          0.1038 
_refine_ls_wR_factor_gt           0.1002 
_refine_ls_goodness_of_fit_ref    1.308 
_refine_ls_restrained_S_all       1.308 
_refine_ls_shift/su_max           0.000 
_refine_ls_shift/su_mean          0.000 
 
loop_ 
 _atom_site_label 
 _atom_site_type_symbol 
 _atom_site_fract_x 
 _atom_site_fract_y 
 _atom_site_fract_z 
 _atom_site_U_iso_or_equiv 
 _atom_site_adp_type 
 _atom_site_occupancy 
 _atom_site_symmetry_multiplicity 
 _atom_site_calc_flag 
 _atom_site_refinement_flags 
 _atom_site_disorder_assembly 
 _atom_site_disorder_group 
C7 C 0.171(5) 0.131(4) 0.369(4) 0.22(2) Uiso 0.50 1 d PD . . 
U1 U 0.6667 0.3333 0.7500 0.02417(16) Uani 1 6 d S . . 
Si1 Si 0.9951(2) 0.49754(12) 0.7500 0.0702(8) Uani 1 2 d S . . 
O1 O 0.6667 0.3333 0.6208(4) 0.060(2) Uani 1 3 d S . . 
C2 C 0.6667 0.3333 0.5332(9) 0.128(10) Uani 1 3 d S . . 
C1 C 0.8613(9) 0.3414(12) 0.7501(12) 0.063(4) Uani 0.50 1 d P . . 
H1A H 0.8656 0.2999 0.7987 0.075 Uiso 0.50 1 calc PR . . 
H1B H 0.8656 0.2998 0.7016 0.075 Uiso 0.50 1 calc PR . . 
C3 C 0.5353(15) 0.265(3) 0.5055(8) 0.194(8) Uani 1 1 d . . . 
H3A H 0.4921 0.1969 0.5403 0.291 Uiso 1 1 calc R . . 
H3B H 0.5306 0.2402 0.4490 0.291 Uiso 1 1 calc R . . 
H3C H 0.5019 0.3157 0.5102 0.291 Uiso 1 1 calc R . . 
C6 C 1.1362(14) 0.6438(12) 0.745(2) 0.103(9) Uani 0.50 1 d P . . 
C4 C 1.004(2) 0.579(2) 0.656(2) 0.148(12) Uani 0.50 1 d P . . 
C5 C 0.987(2) 0.414(3) 0.654(2) 0.160(14) Uani 0.50 1 d P . . 
Li1 Li 0.0000 0.0000 0.5000 0.062(7) Uani 1 6 d S . . 
O2 O 0.145(3) 0.014(3) 0.394(3) 0.240(19) Uani 0.50 1 d PD . . 
O3 O 0.017(3) 0.1344(16) 0.5759(13) 0.26(2) Uani 0.50 1 d PD . . 
C9 C -0.066(4) 0.089(4) 0.646(3) 0.21(2) Uiso 0.50 1 d PD . . 
C10 C 0.073(3) 0.255(2) 0.545(3) 0.182(15) Uiso 0.50 1 d PD . . 
C8 C 0.188(4) -0.045(4) 0.448(3) 0.22(2) Uiso 0.50 1 d PD . . 
 
loop_ 
 _atom_site_aniso_label 
 _atom_site_aniso_U_11 
 _atom_site_aniso_U_22 
 _atom_site_aniso_U_33 
 _atom_site_aniso_U_23 
 _atom_site_aniso_U_13 
 _atom_site_aniso_U_12 
U1 0.02388(18) 0.02388(18) 0.0248(2) 0.000 0.000 0.01194(9) 
Si1 0.0234(11) 0.0386(10) 0.144(3) 0.0000(13) 0.000 0.0117(5) 
O1 0.077(4) 0.077(4) 0.025(3) 0.000 0.000 0.0386(18) 
C2 0.178(16) 0.178(16) 0.027(6) 0.000 0.000 0.089(8) 
C1 0.010(5) 0.053(8) 0.118(13) -0.016(8) -0.007(6) 0.011(5) 
C3 0.193(17) 0.32(3) 0.055(6) -0.038(11) -0.065(9) 0.12(2) 
C6 0.038(8) 0.025(7) 0.24(3) 0.008(10) 0.016(12) 0.013(6) 
C4 0.054(11) 0.107(18) 0.25(3) 0.10(2) 0.000(19) 0.013(13) 
C5 0.051(12) 0.16(3) 0.27(3) -0.12(3) -0.010(18) 0.055(15) 
Li1 0.048(9) 0.048(9) 0.09(2) 0.000 0.000 0.024(4) 
O2 0.14(2) 0.17(3) 0.42(6) -0.07(3) -0.11(3) 0.08(2) 
O3 0.48(6) 0.050(10) 0.113(15) -0.036(10) -0.06(3) 0.04(2) 
 
_geom_special_details 
; 
 All esds (except the esd in the dihedral angle between two l.s. planes) 
 are estimated using the full covariance matrix.  The cell esds are taken 
 into account individually in the estimation of esds in distances, angles 
 and torsion angles; correlations between esds in cell parameters are only 
 used when they are defined by crystal symmetry.  An approximate (isotropic) 
 treatment of cell esds is used for estimating esds involving l.s. planes. 
; 
 
loop_ 
 _geom_bond_atom_site_label_1 
 _geom_bond_atom_site_label_2 
 _geom_bond_distance 
 _geom_bond_site_symmetry_2 
 _geom_bond_publ_flag 
C7 O3 0.98(5) 8_556 ? 
C7 O2 1.449(10) . ? 
C7 C9 1.28(6) 8_556 ? 
C7 C9 2.50(6) 7_556 ? 
C7 C10 1.69(6) 8_556 ? 
U1 O1 2.085(7) 4_666 ? 
U1 O1 2.085(7) . ? 
U1 C1 2.490(12) . ? 
U1 C1 2.490(12) 4_666 ? 
U1 C1 2.490(12) 3_665 ? 
U1 C1 2.490(12) 6_556 ? 
U1 C1 2.490(12) 2_655 ? 
U1 C1 2.490(12) 5_656 ? 
Si1 C4 1.82(2) . ? 
Si1 C4 1.82(2) 6_556 ? 
Si1 C6 1.879(15) . ? 
Si1 C6 1.879(15) 6_556 ? 
Si1 C5 1.87(3) 6_556 ? 
Si1 C5 1.87(3) . ? 
Si1 C1 1.910(12) 6_556 ? 
Si1 C1 1.910(13) . ? 
O1 C2 1.414(16) . ? 
C2 C3 1.552(15) 2_655 ? 
C2 C3 1.552(15) . ? 
C2 C3 1.552(15) 3_665 ? 
C6 C6 1.98(3) 6_556 ? 
Li1 O2 2.49(4) 3 ? 
Li1 O2 2.49(4) 9_556 ? 
Li1 O2 2.49(4) 2 ? 
Li1 O2 2.49(4) 7_556 ? 
Li1 O2 2.49(4) . ? 
Li1 O2 2.49(4) 8_556 ? 
Li1 O3 2.059(18) 9_556 ? 
Li1 O3 2.059(18) . ? 
Li1 O3 2.059(18) 8_556 ? 
Li1 O3 2.059(18) 2 ? 
Li1 O3 2.059(18) 7_556 ? 
Li1 O3 2.059(18) 3 ? 
O2 C9 1.38(5) 7_556 ? 
O2 C8 1.446(10) . ? 
O2 O3 1.51(4) 8_556 ? 
O3 C7 0.98(6) 9_556 ? 
O3 C10 1.457(10) . ? 
O3 C9 1.466(10) . ? 
O3 O2 1.51(4) 9_556 ? 
C9 O2 1.38(5) 7_556 ? 
C9 C7 1.28(6) 9_556 ? 
C9 C8 2.06(7) 7_556 ? 
C9 C7 2.50(6) 7_556 ? 
C10 C8 1.59(5) 2 ? 
C10 C7 1.69(6) 9_556 ? 
C8 C10 1.59(5) 3 ? 
C8 C9 2.06(7) 7_556 ? 
 
loop_ 
 _geom_angle_atom_site_label_1 
 _geom_angle_atom_site_label_2 
 _geom_angle_atom_site_label_3 
 _geom_angle 
 _geom_angle_site_symmetry_1 
 _geom_angle_site_symmetry_3 
 _geom_angle_publ_flag 
O3 C7 O2 74(3) 8_556 . ? 
O3 C7 C9 80(4) 8_556 8_556 ? 
O2 C7 C9 122(4) . 8_556 ? 
O3 C7 C9 87(4) 8_556 7_556 ? 
O2 C7 C9 27(2) . 7_556 ? 
C9 C7 C9 102(5) 8_556 7_556 ? 
O3 C7 C10 59(3) 8_556 8_556 ? 
O2 C7 C10 87(3) . 8_556 ? 
C9 C7 C10 121(5) 8_556 8_556 ? 
C9 C7 C10 114(3) 7_556 8_556 ? 
O1 U1 O1 180.000(1) 4_666 . ? 
O1 U1 C1 90.0(5) 4_666 . ? 
O1 U1 C1 90.0(5) . . ? 
O1 U1 C1 90.0(5) 4_666 4_666 ? 
O1 U1 C1 90.0(5) . 4_666 ? 
C1 U1 C1 64.2(6) . 4_666 ? 
O1 U1 C1 90.0(5) 4_666 3_665 ? 
O1 U1 C1 90.0(5) . 3_665 ? 
C1 U1 C1 120.000(5) . 3_665 ? 
C1 U1 C1 55.8(6) 4_666 3_665 ? 
O1 U1 C1 90.0(5) 4_666 6_556 ? 
O1 U1 C1 90.0(5) . 6_556 ? 
C1 U1 C1 55.8(6) . 6_556 ? 
C1 U1 C1 120.000(7) 4_666 6_556 ? 
C1 U1 C1 175.8(6) 3_665 6_556 ? 
O1 U1 C1 90.0(5) 4_666 2_655 ? 
O1 U1 C1 90.0(5) . 2_655 ? 
C1 U1 C1 120.000(12) . 2_655 ? 
C1 U1 C1 175.8(6) 4_666 2_655 ? 
C1 U1 C1 120.000(6) 3_665 2_655 ? 
C1 U1 C1 64.2(6) 6_556 2_655 ? 
O1 U1 C1 90.0(5) 4_666 5_656 ? 
O1 U1 C1 90.0(5) . 5_656 ? 
C1 U1 C1 175.8(6) . 5_656 ? 
C1 U1 C1 120.000(11) 4_666 5_656 ? 
C1 U1 C1 64.2(6) 3_665 5_656 ? 
C1 U1 C1 120.000(5) 6_556 5_656 ? 
C1 U1 C1 55.8(6) 2_655 5_656 ? 
C4 Si1 C4 173.3(16) . 6_556 ? 
C4 Si1 C6 67.9(12) . . ? 
C4 Si1 C6 106.1(13) 6_556 . ? 
C4 Si1 C6 106.1(13) . 6_556 ? 
C4 Si1 C6 67.9(12) 6_556 6_556 ? 
C6 Si1 C6 63.7(10) . 6_556 ? 
C4 Si1 C5 112.4(15) . 6_556 ? 
C4 Si1 C5 67.9(15) 6_556 6_556 ? 
C6 Si1 C5 77.4(12) . 6_556 ? 
C6 Si1 C5 107.4(13) 6_556 6_556 ? 
C4 Si1 C5 67.9(15) . . ? 
C4 Si1 C5 112.4(15) 6_556 . ? 
C6 Si1 C5 107.4(13) . . ? 
C6 Si1 C5 77.4(12) 6_556 . ? 
C5 Si1 C5 174.5(14) 6_556 . ? 
C4 Si1 C1 73.0(11) . 6_556 ? 
C4 Si1 C1 112.6(10) 6_556 6_556 ? 
C6 Si1 C1 110.6(6) . 6_556 ? 
C6 Si1 C1 173.7(8) 6_556 6_556 ? 
C5 Si1 C1 67.8(11) 6_556 6_556 ? 
C5 Si1 C1 107.6(9) . 6_556 ? 
C4 Si1 C1 112.6(10) . . ? 
C4 Si1 C1 73.0(11) 6_556 . ? 
C6 Si1 C1 173.7(8) . . ? 
C6 Si1 C1 110.6(6) 6_556 . ? 
C5 Si1 C1 107.6(10) 6_556 . ? 
C5 Si1 C1 67.8(11) . . ? 
C1 Si1 C1 75.2(8) 6_556 . ? 
C2 O1 U1 180.000(3) . . ? 
O1 C2 C3 106.7(8) . 2_655 ? 
O1 C2 C3 106.7(8) . . ? 
C3 C2 C3 112.1(7) 2_655 . ? 
O1 C2 C3 106.7(8) . 3_665 ? 
C3 C2 C3 112.1(7) 2_655 3_665 ? 
C3 C2 C3 112.1(7) . 3_665 ? 
Si1 C1 U1 114.5(6) . . ? 
Si1 C6 C6 58.1(5) . 6_556 ? 
O2 Li1 O2 180.0(14) 3 9_556 ? 
O2 Li1 O2 78.1(12) 3 2 ? 
O2 Li1 O2 101.9(12) 9_556 2 ? 
O2 Li1 O2 101.9(12) 3 7_556 ? 
O2 Li1 O2 78.1(12) 9_556 7_556 ? 
O2 Li1 O2 101.9(12) 2 7_556 ? 
O2 Li1 O2 78.1(12) 3 . ? 
O2 Li1 O2 101.9(12) 9_556 . ? 
O2 Li1 O2 78.1(12) 2 . ? 
O2 Li1 O2 180.000(4) 7_556 . ? 
O2 Li1 O2 101.9(12) 3 8_556 ? 
O2 Li1 O2 78.1(12) 9_556 8_556 ? 
O2 Li1 O2 180.000(4) 2 8_556 ? 
O2 Li1 O2 78.1(12) 7_556 8_556 ? 
O2 Li1 O2 101.9(12) . 8_556 ? 
O2 Li1 O3 53.7(11) 3 9_556 ? 
O2 Li1 O3 126.3(11) 9_556 9_556 ? 
O2 Li1 O3 37.2(13) 2 9_556 ? 
O2 Li1 O3 80.5(10) 7_556 9_556 ? 
O2 Li1 O3 99.5(10) . 9_556 ? 
O2 Li1 O3 142.8(13) 8_556 9_556 ? 
O2 Li1 O3 142.8(13) 3 . ? 
O2 Li1 O3 37.2(13) 9_556 . ? 
O2 Li1 O3 80.5(10) 2 . ? 
O2 Li1 O3 53.7(11) 7_556 . ? 
O2 Li1 O3 126.3(11) . . ? 
O2 Li1 O3 99.5(10) 8_556 . ? 
O3 Li1 O3 91.7(9) 9_556 . ? 
O2 Li1 O3 99.5(10) 3 8_556 ? 
O2 Li1 O3 80.5(11) 9_556 8_556 ? 
O2 Li1 O3 53.7(11) 2 8_556 ? 
O2 Li1 O3 142.8(13) 7_556 8_556 ? 
O2 Li1 O3 37.2(13) . 8_556 ? 
O2 Li1 O3 126.3(11) 8_556 8_556 ? 
O3 Li1 O3 88.3(9) 9_556 8_556 ? 
O3 Li1 O3 91.7(9) . 8_556 ? 
O2 Li1 O3 80.5(10) 3 2 ? 
O2 Li1 O3 99.5(10) 9_556 2 ? 
O2 Li1 O3 126.3(11) 2 2 ? 
O2 Li1 O3 37.2(13) 7_556 2 ? 
O2 Li1 O3 142.8(13) . 2 ? 
O2 Li1 O3 53.7(11) 8_556 2 ? 
O3 Li1 O3 91.7(9) 9_556 2 ? 
O3 Li1 O3 88.3(9) . 2 ? 
O3 Li1 O3 180(2) 8_556 2 ? 
O2 Li1 O3 37.2(13) 3 7_556 ? 
O2 Li1 O3 142.8(13) 9_556 7_556 ? 
O2 Li1 O3 99.5(10) 2 7_556 ? 
O2 Li1 O3 126.3(11) 7_556 7_556 ? 
O2 Li1 O3 53.7(11) . 7_556 ? 
O2 Li1 O3 80.5(10) 8_556 7_556 ? 
O3 Li1 O3 88.3(9) 9_556 7_556 ? 
O3 Li1 O3 180.0(7) . 7_556 ? 
O3 Li1 O3 88.3(9) 8_556 7_556 ? 
O3 Li1 O3 91.7(9) 2 7_556 ? 
O2 Li1 O3 126.3(11) 3 3 ? 
O2 Li1 O3 53.7(11) 9_556 3 ? 
O2 Li1 O3 142.8(13) 2 3 ? 
O2 Li1 O3 99.5(10) 7_556 3 ? 
O2 Li1 O3 80.5(10) . 3 ? 
O2 Li1 O3 37.2(13) 8_556 3 ? 
O3 Li1 O3 180.000(7) 9_556 3 ? 
O3 Li1 O3 88.3(9) . 3 ? 
O3 Li1 O3 91.7(9) 8_556 3 ? 
O3 Li1 O3 88.3(9) 2 3 ? 
O3 Li1 O3 91.7(9) 7_556 3 ? 
C9 O2 C8 94(4) 7_556 . ? 
C9 O2 C7 124(4) 7_556 . ? 
C8 O2 C7 141(4) . . ? 
C9 O2 O3 131(3) 7_556 8_556 ? 
C8 O2 O3 121(4) . 8_556 ? 
C7 O2 O3 39(2) . 8_556 ? 
C9 O2 Li1 94(3) 7_556 . ? 
C8 O2 Li1 91(3) . . ? 
C7 O2 Li1 92(3) . . ? 
O3 O2 Li1 55.8(17) 8_556 . ? 
C7 O3 C10 85(4) 9_556 . ? 
C7 O3 C9 59(3) 9_556 . ? 
C10 O3 C9 124.9(13) . . ? 
C7 O3 O2 67(2) 9_556 9_556 ? 
C10 O3 O2 94(3) . 9_556 ? 
C9 O3 O2 107(3) . 9_556 ? 
C7 O3 Li1 146(4) 9_556 . ? 
C10 O3 Li1 120.1(19) . . ? 
C9 O3 Li1 112(2) . . ? 
O2 O3 Li1 87(3) 9_556 . ? 
O2 C9 O3 94(4) 7_556 . ? 
O2 C9 C7 134(5) 7_556 9_556 ? 
O3 C9 C7 41(2) . 9_556 ? 
O2 C9 C8 44(2) 7_556 7_556 ? 
O3 C9 C8 82(3) . 7_556 ? 
C7 C9 C8 117(4) 9_556 7_556 ? 
O2 C9 C7 29(2) 7_556 7_556 ? 
O3 C9 C7 105(3) . 7_556 ? 
C7 C9 C7 134(4) 9_556 7_556 ? 
C8 C9 C7 73(3) 7_556 7_556 ? 
O3 C10 C8 101(3) . 2 ? 
O3 C10 C7 35.4(19) . 9_556 ? 
C8 C10 C7 136(4) 2 9_556 ? 
O2 C8 C10 137(5) . 3 ? 
O2 C8 C9 42(2) . 7_556 ? 
C10 C8 C9 136(4) 3 7_556 ? 
 
_diffrn_measured_fraction_theta_max    0.966 
_diffrn_reflns_theta_full              27.42 
_diffrn_measured_fraction_theta_full   0.966 
_refine_diff_density_max    1.175 
_refine_diff_density_min   -0.963 
_refine_diff_density_rms    0.155 


##########################################################END######################################################


 
data_Complex_3 
 
_audit_creation_method            SHELXL-97 
_chemical_name_systematic 
; 
 ? 
; 
_chemical_name_common             ? 
_chemical_melting_point           ? 
_chemical_formula_moiety          ? 
_chemical_formula_sum 
 'C24 H61 Ag O4 Si3 U' 
_chemical_formula_weight          843.90 
 
loop_ 
 _atom_type_symbol 
 _atom_type_description 
 _atom_type_scat_dispersion_real 
 _atom_type_scat_dispersion_imag 
 _atom_type_scat_source 
 'C'  'C'   0.0033   0.0016 
 'International Tables Vol C Tables 4.2.6.8 and 6.1.1.4' 
 'H'  'H'   0.0000   0.0000 
 'International Tables Vol C Tables 4.2.6.8 and 6.1.1.4' 
 'O'  'O'   0.0106   0.0060 
 'International Tables Vol C Tables 4.2.6.8 and 6.1.1.4' 
 'Si'  'Si'   0.0817   0.0704 
 'International Tables Vol C Tables 4.2.6.8 and 6.1.1.4' 
 'Ag'  'Ag'  -0.8971   1.1015 
 'International Tables Vol C Tables 4.2.6.8 and 6.1.1.4' 
 'U'  'U'  -9.6767   9.6646 
 'International Tables Vol C Tables 4.2.6.8 and 6.1.1.4' 
 
_symmetry_cell_setting            Monoclinic 
_symmetry_space_group_name_H-M    P2(1)/n 
 
loop_ 
 _symmetry_equiv_pos_as_xyz 
 'x, y, z' 
 '-x+1/2, y+1/2, -z+1/2' 
 '-x, -y, -z' 
 'x-1/2, -y-1/2, z-1/2' 
 
_cell_length_a                    14.946(2) 
_cell_length_b                    16.125(3) 
_cell_length_c                    15.267(2) 
_cell_angle_alpha                 90.00 
_cell_angle_beta                  91.738(2) 
_cell_angle_gamma                 90.00 
_cell_volume                      3677.8(10) 
_cell_formula_units_Z             4 
_cell_measurement_temperature     150(2) 
_cell_measurement_reflns_used     ? 
_cell_measurement_theta_min       ? 
_cell_measurement_theta_max       ? 
 
_exptl_crystal_description        block 
_exptl_crystal_colour             pink 
_exptl_crystal_size_max           0.9 
_exptl_crystal_size_mid           0.8 
_exptl_crystal_size_min           0.8 
_exptl_crystal_density_meas       ? 
_exptl_crystal_density_diffrn     1.524 
_exptl_crystal_density_method     'not measured' 
_exptl_crystal_F_000              1672 
_exptl_absorpt_coefficient_mu     5.050 
_exptl_absorpt_correction_type    'Empirical'
_exptl_absorpt_correction_T_min   0.157 
_exptl_absorpt_correction_T_max   0.354 
_exptl_absorpt_process_details    'Psi Scan' 
 
_exptl_special_details 
; 
 ? 
; 
 
_diffrn_ambient_temperature       150(2) 
_diffrn_radiation_wavelength      0.71073 
_diffrn_radiation_type            MoK\a 
_diffrn_radiation_source          'fine-focus sealed tube' 
_diffrn_radiation_monochromator   graphite 
_diffrn_measurement_device_type   'CCD area detector'
_diffrn_measurement_method        'omega scan' 
_diffrn_detector_area_resol_mean  ? 
_diffrn_standards_number          ? 
_diffrn_standards_interval_count  ? 
_diffrn_standards_interval_time   ? 
_diffrn_standards_decay_%         ? 
_diffrn_reflns_number             30428 
_diffrn_reflns_av_R_equivalents   0.1364 
_diffrn_reflns_av_sigmaI/netI     0.0871 
_diffrn_reflns_limit_h_min        -19 
_diffrn_reflns_limit_h_max        18 
_diffrn_reflns_limit_k_min        -20 
_diffrn_reflns_limit_k_max        20 
_diffrn_reflns_limit_l_min        -18 
_diffrn_reflns_limit_l_max        19 
_diffrn_reflns_theta_min          1.84 
_diffrn_reflns_theta_max          27.09 
_reflns_number_total              7740 
_reflns_number_gt                 5966 
_reflns_threshold_expression      >2sigma(I) 
 
_computing_data_collection        ? 
_computing_cell_refinement        ? 
_computing_data_reduction         ? 
_computing_structure_solution     'SHELXS-97 (Sheldrick, 1990)' 
_computing_structure_refinement   'SHELXL-97 (Sheldrick, 1997)' 
_computing_molecular_graphics     ? 
_computing_publication_material   ? 
 
_refine_special_details 
; 
 Refinement of F^2^ against ALL reflections.  The weighted R-factor wR and 
 goodness of fit S are based on F^2^, conventional R-factors R are based 
 on F, with F set to zero for negative F^2^. The threshold expression of 
 F^2^ > 2sigma(F^2^) is used only for calculating R-factors(gt) etc. and is 
 not relevant to the choice of reflections for refinement.  R-factors based 
 on F^2^ are statistically about twice as large as those based on F, and R- 
 factors based on ALL data will be even larger. 
; 
 
_refine_ls_structure_factor_coef  Fsqd  
_refine_ls_matrix_type            full 
_refine_ls_weighting_scheme       calc  
_refine_ls_weighting_details 
 'calc w=1/[\s^2^(Fo^2^)+(0.0470P)^2^+0.0000P] where P=(Fo^2^+2Fc^2^)/3' 
_atom_sites_solution_primary      direct 
_atom_sites_solution_secondary    difmap 
_atom_sites_solution_hydrogens    geom 
_refine_ls_hydrogen_treatment     constr 
_refine_ls_extinction_method      none 
_refine_ls_extinction_coef        ? 
_refine_ls_number_reflns          7740 
_refine_ls_number_parameters      303 
_refine_ls_number_restraints      9 
_refine_ls_R_factor_all           0.0580 
_refine_ls_R_factor_gt            0.0411 
_refine_ls_wR_factor_ref          0.1095 
_refine_ls_wR_factor_gt           0.1026 
_refine_ls_goodness_of_fit_ref    0.989 
_refine_ls_restrained_S_all       1.001 
_refine_ls_shift/su_max           0.001 
_refine_ls_shift/su_mean          0.000 
 
loop_ 
 _atom_site_label 
 _atom_site_type_symbol 
 _atom_site_fract_x 
 _atom_site_fract_y 
 _atom_site_fract_z 
 _atom_site_U_iso_or_equiv 
 _atom_site_adp_type 
 _atom_site_occupancy 
 _atom_site_symmetry_multiplicity 
 _atom_site_calc_flag 
 _atom_site_refinement_flags 
 _atom_site_disorder_assembly 
 _atom_site_disorder_group 
U1 U 0.356434(14) 0.207375(13) 0.576402(13) 0.01757(8) Uani 1 1 d . . . 
Ag1 Ag 0.19683(3) 0.33309(3) 0.54639(3) 0.02298(12) Uani 1 1 d . . . 
Si3 Si -0.01941(12) 0.32688(13) 0.60583(11) 0.0299(4) Uani 1 1 d . . . 
Si1 Si 0.27252(12) 0.39303(11) 0.36934(11) 0.0250(4) Uani 1 1 d . . . 
Si2 Si 0.59141(12) 0.24257(12) 0.49060(11) 0.0262(4) Uani 1 1 d . . . 
O1 O 0.4073(3) 0.2997(3) 0.6586(3) 0.0251(10) Uani 1 1 d . . . 
O2 O 0.2844(3) 0.1160(2) 0.5117(2) 0.0240(9) Uani 1 1 d . . . 
O3 O 0.2726(3) 0.1579(3) 0.7131(3) 0.0287(10) Uani 1 1 d . . . 
O4 O 0.4332(3) 0.0949(3) 0.6739(3) 0.0259(10) Uani 1 1 d . . . 
C1 C 0.3032(4) 0.3155(4) 0.4542(4) 0.0244(14) Uani 1 1 d . . . 
H1A H 0.3615 0.3271 0.4811 0.029 Uiso 1 1 calc R . . 
H1B H 0.3028 0.2597 0.4305 0.029 Uiso 1 1 calc R . . 
C13 C 0.2406(4) 0.0615(4) 0.4496(4) 0.0260(14) Uani 1 1 d . . . 
C9 C 0.6784(5) 0.2031(5) 0.4150(5) 0.0434(19) Uani 1 1 d . . . 
H9A H 0.6951 0.1477 0.4316 0.065 Uiso 1 1 calc R . . 
H9B H 0.7301 0.2384 0.4188 0.065 Uiso 1 1 calc R . . 
H9C H 0.6545 0.2030 0.3559 0.065 Uiso 1 1 calc R . . 
C2 C 0.4898(4) 0.1772(4) 0.4913(4) 0.0279(14) Uani 1 1 d . . . 
H2A H 0.5096 0.1223 0.5090 0.033 Uiso 1 1 calc R . . 
H2B H 0.4691 0.1726 0.4306 0.033 Uiso 1 1 calc R . . 
C3 C 0.0946(4) 0.3629(4) 0.6329(4) 0.0313(15) Uani 1 1 d . . . 
H3A H 0.1118 0.3408 0.6901 0.038 Uiso 1 1 calc R . . 
H3B H 0.0928 0.4228 0.6384 0.038 Uiso 1 1 calc R . . 
C17 C 0.4171(6) 0.3693(5) 0.7166(6) 0.0526(15) Uani 1 1 d . . . 
C4 C 0.2874(5) 0.4983(4) 0.4154(5) 0.0461(19) Uani 1 1 d . . . 
H4A H 0.2435 0.5078 0.4589 0.069 Uiso 1 1 calc R . . 
H4B H 0.2802 0.5385 0.3694 0.069 Uiso 1 1 calc R . . 
H4C H 0.3463 0.5031 0.4418 0.069 Uiso 1 1 calc R . . 
C12 C -0.0994(5) 0.3501(5) 0.6960(4) 0.0393(18) Uani 1 1 d . . . 
H12A H -0.0799 0.3219 0.7486 0.059 Uiso 1 1 calc R . . 
H12B H -0.1583 0.3314 0.6787 0.059 Uiso 1 1 calc R . . 
H12C H -0.1006 0.4088 0.7065 0.059 Uiso 1 1 calc R . . 
C8 C 0.5631(5) 0.3489(4) 0.4507(4) 0.0333(16) Uani 1 1 d . . . 
H8A H 0.5306 0.3453 0.3956 0.050 Uiso 1 1 calc R . . 
H8B H 0.6172 0.3799 0.4432 0.050 Uiso 1 1 calc R . . 
H8C H 0.5269 0.3764 0.4927 0.050 Uiso 1 1 calc R . . 
C21 C 0.1781(5) 0.1529(5) 0.7085(4) 0.0366(17) Uani 1 1 d . . . 
H21A H 0.1603 0.0979 0.6913 0.055 Uiso 1 1 calc R . . 
H21B H 0.1550 0.1921 0.6662 0.055 Uiso 1 1 calc R . . 
H21C H 0.1547 0.1653 0.7649 0.055 Uiso 1 1 calc R . . 
C7 C 0.6466(5) 0.2472(5) 0.6020(5) 0.0461(19) Uani 1 1 d . . . 
H7A H 0.6022 0.2574 0.6449 0.069 Uiso 1 1 calc R . . 
H7B H 0.6899 0.2911 0.6037 0.069 Uiso 1 1 calc R . . 
H7C H 0.6759 0.1954 0.6145 0.069 Uiso 1 1 calc R . . 
C23 C 0.4121(5) 0.1059(5) 0.7642(4) 0.0351(17) Uani 1 1 d . . . 
H23A H 0.4342 0.1593 0.7846 0.042 Uiso 1 1 calc R . . 
H23B H 0.4414 0.0631 0.7993 0.042 Uiso 1 1 calc R . . 
C22 C 0.3122(5) 0.1013(4) 0.7751(4) 0.0361(17) Uani 1 1 d . . . 
H22A H 0.2907 0.0454 0.7640 0.043 Uiso 1 1 calc R . . 
H22B H 0.2971 0.1169 0.8342 0.043 Uiso 1 1 calc R . . 
C16 C 0.3126(5) 0.0037(5) 0.4153(5) 0.047(2) Uani 1 1 d . . . 
H16A H 0.3574 0.0359 0.3870 0.070 Uiso 1 1 calc R . . 
H16B H 0.2859 -0.0345 0.3741 0.070 Uiso 1 1 calc R . . 
H16C H 0.3398 -0.0264 0.4634 0.070 Uiso 1 1 calc R . . 
C10 C -0.0641(5) 0.3795(6) 0.5039(5) 0.057(2) Uani 1 1 d . . . 
H10A H -0.0562 0.4384 0.5095 0.086 Uiso 1 1 calc R . . 
H10B H -0.1266 0.3671 0.4958 0.086 Uiso 1 1 calc R . . 
H10C H -0.0323 0.3599 0.4543 0.086 Uiso 1 1 calc R . . 
C24 C 0.4369(5) 0.0109(4) 0.6488(5) 0.0409(18) Uani 1 1 d . . . 
H24A H 0.4855 -0.0160 0.6800 0.061 Uiso 1 1 calc R . . 
H24B H 0.4461 0.0073 0.5869 0.061 Uiso 1 1 calc R . . 
H24C H 0.3817 -0.0160 0.6623 0.061 Uiso 1 1 calc R . . 
C11 C -0.0255(6) 0.2133(5) 0.5852(6) 0.054(2) Uani 1 1 d . . . 
H11A H 0.0142 0.1990 0.5393 0.081 Uiso 1 1 calc R . . 
H11B H -0.0857 0.1985 0.5679 0.081 Uiso 1 1 calc R . . 
H11C H -0.0082 0.1840 0.6377 0.081 Uiso 1 1 calc R . . 
C14 C 0.1697(5) 0.0142(5) 0.4957(5) 0.052(2) Uani 1 1 d . . . 
H14A H 0.1962 -0.0149 0.5448 0.078 Uiso 1 1 calc R . . 
H14B H 0.1421 -0.0249 0.4559 0.078 Uiso 1 1 calc R . . 
H14C H 0.1252 0.0521 0.5158 0.078 Uiso 1 1 calc R . . 
C15 C 0.2000(6) 0.1144(5) 0.3749(5) 0.049(2) Uani 1 1 d . . . 
H15A H 0.1684 0.1605 0.3990 0.073 Uiso 1 1 calc R . . 
H15B H 0.1593 0.0812 0.3399 0.073 Uiso 1 1 calc R . . 
H15C H 0.2469 0.1345 0.3389 0.073 Uiso 1 1 calc R . . 
C6 C 0.1556(5) 0.3776(5) 0.3307(5) 0.048(2) Uani 1 1 d . . . 
H6A H 0.1489 0.3228 0.3066 0.072 Uiso 1 1 calc R . . 
H6B H 0.1406 0.4179 0.2863 0.072 Uiso 1 1 calc R . . 
H6C H 0.1165 0.3840 0.3789 0.072 Uiso 1 1 calc R . . 
C5 C 0.3453(5) 0.3846(5) 0.2736(4) 0.047(2) Uani 1 1 d . . . 
H5A H 0.4067 0.3915 0.2924 0.071 Uiso 1 1 calc R . . 
H5B H 0.3293 0.4269 0.2317 0.071 Uiso 1 1 calc R . . 
H5C H 0.3375 0.3310 0.2470 0.071 Uiso 1 1 calc R . . 
C23A C 0.4473(9) 0.3358(9) 0.8067(10) 0.0526(15) Uani 0.50 1 d PD . . 
C21A C 0.4815(9) 0.4288(9) 0.6799(9) 0.0526(15) Uani 0.50 1 d PD . . 
C21B C 0.3922(9) 0.4474(8) 0.6601(9) 0.0526(15) Uani 0.50 1 d PD . . 
C23B C 0.5056(10) 0.3774(9) 0.7510(9) 0.0526(15) Uani 0.50 1 d PD . . 
C22B C 0.3529(9) 0.3584(9) 0.7867(10) 0.0526(15) Uani 0.50 1 d PD . . 
C22A C 0.3291(10) 0.4114(8) 0.7229(9) 0.0526(15) Uani 0.50 1 d PD . . 
 
loop_ 
 _atom_site_aniso_label 
 _atom_site_aniso_U_11 
 _atom_site_aniso_U_22 
 _atom_site_aniso_U_33 
 _atom_site_aniso_U_23 
 _atom_site_aniso_U_13 
 _atom_site_aniso_U_12 
U1 0.02125(14) 0.01644(13) 0.01495(11) 0.00020(8) -0.00072(8) -0.00057(9) 
Ag1 0.0221(3) 0.0264(3) 0.0203(2) 0.00103(19) -0.00044(18) 0.0023(2) 
Si3 0.0246(10) 0.0437(12) 0.0213(9) -0.0029(8) -0.0008(7) 0.0028(9) 
Si1 0.0276(10) 0.0239(9) 0.0233(8) 0.0062(7) -0.0014(7) 0.0037(7) 
Si2 0.0247(9) 0.0269(9) 0.0271(9) 0.0017(8) 0.0031(7) 0.0013(8) 
O1 0.025(2) 0.024(2) 0.026(2) -0.0031(18) 0.0015(18) -0.0045(18) 
O2 0.033(3) 0.019(2) 0.019(2) -0.0005(17) -0.0029(18) -0.0018(19) 
O3 0.034(3) 0.033(3) 0.019(2) 0.0030(19) 0.0042(18) -0.002(2) 
O4 0.032(3) 0.026(2) 0.020(2) 0.0062(18) -0.0028(18) -0.001(2) 
C1 0.024(3) 0.023(3) 0.026(3) 0.004(3) -0.003(3) 0.004(3) 
C13 0.028(4) 0.024(3) 0.026(3) -0.006(3) -0.005(3) -0.004(3) 
C9 0.037(4) 0.040(5) 0.054(5) 0.006(4) 0.019(4) 0.006(4) 
C2 0.029(4) 0.028(3) 0.027(3) -0.003(3) 0.002(3) 0.003(3) 
C3 0.031(4) 0.040(4) 0.023(3) -0.005(3) -0.003(3) 0.005(3) 
C17 0.047(3) 0.046(3) 0.065(4) -0.035(3) 0.009(3) -0.007(3) 
C4 0.055(5) 0.026(4) 0.057(5) 0.007(4) -0.002(4) 0.001(4) 
C12 0.030(4) 0.062(5) 0.027(3) -0.006(3) 0.003(3) -0.003(4) 
C8 0.036(4) 0.029(4) 0.035(4) 0.002(3) 0.002(3) -0.004(3) 
C21 0.037(4) 0.038(4) 0.034(4) 0.003(3) 0.007(3) 0.003(3) 
C7 0.044(5) 0.052(5) 0.042(4) -0.002(4) -0.007(3) 0.000(4) 
C23 0.039(4) 0.044(4) 0.021(3) -0.004(3) -0.013(3) 0.004(3) 
C22 0.046(5) 0.039(4) 0.024(3) 0.006(3) 0.000(3) -0.001(3) 
C16 0.052(5) 0.048(5) 0.041(4) -0.024(4) -0.006(4) 0.002(4) 
C10 0.039(5) 0.096(7) 0.037(4) 0.017(5) 0.001(4) 0.003(5) 
C24 0.054(5) 0.026(4) 0.042(4) 0.005(3) -0.004(4) 0.012(3) 
C11 0.039(5) 0.061(6) 0.062(5) -0.029(4) 0.003(4) -0.008(4) 
C14 0.044(5) 0.055(5) 0.058(5) -0.023(4) 0.007(4) -0.019(4) 
C15 0.063(6) 0.038(4) 0.044(4) -0.011(4) -0.025(4) 0.001(4) 
C6 0.045(5) 0.070(6) 0.029(4) 0.014(4) -0.010(3) 0.000(4) 
C5 0.058(5) 0.057(5) 0.026(4) 0.019(4) 0.004(3) 0.007(4) 
C23A 0.047(3) 0.046(3) 0.065(4) -0.035(3) 0.009(3) -0.007(3) 
C21A 0.047(3) 0.046(3) 0.065(4) -0.035(3) 0.009(3) -0.007(3) 
C21B 0.047(3) 0.046(3) 0.065(4) -0.035(3) 0.009(3) -0.007(3) 
C23B 0.047(3) 0.046(3) 0.065(4) -0.035(3) 0.009(3) -0.007(3) 
C22B 0.047(3) 0.046(3) 0.065(4) -0.035(3) 0.009(3) -0.007(3) 
C22A 0.047(3) 0.046(3) 0.065(4) -0.035(3) 0.009(3) -0.007(3) 
 
_geom_special_details 
; 
 All esds (except the esd in the dihedral angle between two l.s. planes) 
 are estimated using the full covariance matrix.  The cell esds are taken 
 into account individually in the estimation of esds in distances, angles 
 and torsion angles; correlations between esds in cell parameters are only 
 used when they are defined by crystal symmetry.  An approximate (isotropic) 
 treatment of cell esds is used for estimating esds involving l.s. planes. 
; 
 
loop_ 
 _geom_bond_atom_site_label_1 
 _geom_bond_atom_site_label_2 
 _geom_bond_distance 
 _geom_bond_site_symmetry_2 
 _geom_bond_publ_flag 
U1 O2 2.059(4) . ? 
U1 O1 2.077(4) . ? 
U1 C2 2.461(6) . ? 
U1 O4 2.592(4) . ? 
U1 O3 2.592(4) . ? 
U1 C1 2.658(6) . ? 
U1 Ag1 3.1533(6) . ? 
Ag1 C3 2.105(6) . ? 
Ag1 C1 2.173(6) . ? 
Si3 C3 1.836(7) . ? 
Si3 C11 1.860(8) . ? 
Si3 C10 1.878(8) . ? 
Si3 C12 1.888(7) . ? 
Si1 C6 1.844(8) . ? 
Si1 C4 1.848(7) . ? 
Si1 C1 1.848(6) . ? 
Si1 C5 1.854(7) . ? 
Si2 C2 1.848(7) . ? 
Si2 C8 1.864(7) . ? 
Si2 C7 1.868(7) . ? 
Si2 C9 1.876(8) . ? 
O1 C17 1.435(8) . ? 
O2 C13 1.436(7) . ? 
O3 C21 1.415(8) . ? 
O3 C22 1.429(8) . ? 
O4 C24 1.410(8) . ? 
O4 C23 1.434(7) . ? 
C13 C14 1.499(10) . ? 
C13 C16 1.527(9) . ? 
C13 C15 1.535(9) . ? 
C17 C23B 1.414(17) . ? 
C17 C22B 1.470(17) . ? 
C17 C21A 1.481(17) . ? 
C17 C22A 1.485(17) . ? 
C17 C23A 1.534(18) . ? 
C17 C21B 1.564(18) . ? 
C23 C22 1.510(10) . ? 
C23A C23B 1.407(9) . ? 
C23A C22B 1.480(9) . ? 
C21A C21B 1.392(9) . ? 
C21A C23B 1.404(9) . ? 
C21B C22A 1.483(9) . ? 
C22B C22A 1.336(9) . ? 
 
loop_ 
 _geom_angle_atom_site_label_1 
 _geom_angle_atom_site_label_2 
 _geom_angle_atom_site_label_3 
 _geom_angle 
 _geom_angle_site_symmetry_1 
 _geom_angle_site_symmetry_3 
 _geom_angle_publ_flag 
O2 U1 O1 168.35(16) . . ? 
O2 U1 C2 91.46(19) . . ? 
O1 U1 C2 99.97(19) . . ? 
O2 U1 O4 89.50(15) . . ? 
O1 U1 O4 90.39(16) . . ? 
C2 U1 O4 79.26(18) . . ? 
O2 U1 O3 84.71(15) . . ? 
O1 U1 O3 84.90(15) . . ? 
C2 U1 O3 141.57(19) . . ? 
O4 U1 O3 62.51(14) . . ? 
O2 U1 C1 89.50(18) . . ? 
O1 U1 C1 92.88(19) . . ? 
C2 U1 C1 89.4(2) . . ? 
O4 U1 C1 168.56(16) . . ? 
O3 U1 C1 128.70(16) . . ? 
O2 U1 Ag1 90.45(12) . . ? 
O1 U1 Ag1 83.60(12) . . ? 
C2 U1 Ag1 132.18(16) . . ? 
O4 U1 Ag1 148.54(9) . . ? 
O3 U1 Ag1 86.16(10) . . ? 
C1 U1 Ag1 42.86(13) . . ? 
C3 Ag1 C1 174.3(3) . . ? 
C3 Ag1 U1 127.99(18) . . ? 
C1 Ag1 U1 56.31(15) . . ? 
C3 Si3 C11 112.9(4) . . ? 
C3 Si3 C10 110.4(4) . . ? 
C11 Si3 C10 106.9(4) . . ? 
C3 Si3 C12 112.2(3) . . ? 
C11 Si3 C12 106.9(4) . . ? 
C10 Si3 C12 107.3(4) . . ? 
C6 Si1 C4 110.4(4) . . ? 
C6 Si1 C1 110.2(3) . . ? 
C4 Si1 C1 109.3(3) . . ? 
C6 Si1 C5 108.1(4) . . ? 
C4 Si1 C5 107.5(4) . . ? 
C1 Si1 C5 111.4(3) . . ? 
C2 Si2 C8 110.4(3) . . ? 
C2 Si2 C7 111.0(3) . . ? 
C8 Si2 C7 110.5(3) . . ? 
C2 Si2 C9 113.2(3) . . ? 
C8 Si2 C9 105.4(3) . . ? 
C7 Si2 C9 106.2(4) . . ? 
C17 O1 U1 164.3(4) . . ? 
C13 O2 U1 167.4(4) . . ? 
C21 O3 C22 112.9(5) . . ? 
C21 O3 U1 118.9(4) . . ? 
C22 O3 U1 122.0(4) . . ? 
C24 O4 C23 113.1(5) . . ? 
C24 O4 U1 122.4(4) . . ? 
C23 O4 U1 111.1(4) . . ? 
Si1 C1 Ag1 101.3(3) . . ? 
Si1 C1 U1 176.8(3) . . ? 
Ag1 C1 U1 80.83(18) . . ? 
O2 C13 C14 108.5(5) . . ? 
O2 C13 C16 106.7(5) . . ? 
C14 C13 C16 111.5(6) . . ? 
O2 C13 C15 108.2(5) . . ? 
C14 C13 C15 111.2(6) . . ? 
C16 C13 C15 110.6(6) . . ? 
Si2 C2 U1 124.7(3) . . ? 
Si3 C3 Ag1 118.2(3) . . ? 
C23B C17 O1 112.2(8) . . ? 
C23B C17 C22B 111.4(9) . . ? 
O1 C17 C22B 107.4(8) . . ? 
C23B C17 C21A 57.9(6) . . ? 
O1 C17 C21A 109.2(8) . . ? 
C22B C17 C21A 143.1(9) . . ? 
C23B C17 C22A 138.9(10) . . ? 
O1 C17 C22A 108.9(8) . . ? 
C22B C17 C22A 53.8(5) . . ? 
C21A C17 C22A 108.4(9) . . ? 
C23B C17 C23A 56.9(6) . . ? 
O1 C17 C23A 107.4(8) . . ? 
C22B C17 C23A 59.0(6) . . ? 
C21A C17 C23A 113.0(8) . . ? 
C22A C17 C23A 109.9(8) . . ? 
C23B C17 C21B 109.6(8) . . ? 
O1 C17 C21B 105.7(7) . . ? 
C22B C17 C21B 110.4(8) . . ? 
C21A C17 C21B 54.3(6) . . ? 
C22A C17 C21B 58.1(6) . . ? 
C23A C17 C21B 146.9(9) . . ? 
O4 C23 C22 110.3(5) . . ? 
O3 C22 C23 106.6(5) . . ? 
C23B C23A C22B 111.2(14) . . ? 
C23B C23A C17 57.3(9) . . ? 
C22B C23A C17 58.4(9) . . ? 
C21B C21A C23B 121.1(15) . . ? 
C21B C21A C17 65.9(10) . . ? 
C23B C21A C17 58.7(9) . . ? 
C21A C21B C22A 113.5(14) . . ? 
C21A C21B C17 59.8(9) . . ? 
C22A C21B C17 58.3(9) . . ? 
C21A C23B C23A 126.9(15) . . ? 
C21A C23B C17 63.4(10) . . ? 
C23A C23B C17 65.9(10) . . ? 
C22A C22B C17 63.7(11) . . ? 
C22A C22B C23A 122.6(15) . . ? 
C17 C22B C23A 62.7(9) . . ? 
C22B C22A C21B 124.2(15) . . ? 
C22B C22A C17 62.5(10) . . ? 
C21B C22A C17 63.6(9) . . ? 
 
_diffrn_measured_fraction_theta_max    0.954 
_diffrn_reflns_theta_full              27.09 
_diffrn_measured_fraction_theta_full   0.954 
_refine_diff_density_max    2.780 
_refine_diff_density_min   -2.081 
_refine_diff_density_rms    0.199 


##############################################################END###########################################################


 
data_Complex_4
 
_audit_creation_method            SHELXL-97 
_chemical_name_systematic 
; 
 ? 
; 
_chemical_name_common             ? 
_chemical_melting_point           ? 
_chemical_formula_moiety          ? 
_chemical_formula_sum 
 'C40 H74 Li O9 Si4 U' 
_chemical_formula_weight          1056.32 
 
loop_ 
 _atom_type_symbol 
 _atom_type_description 
 _atom_type_scat_dispersion_real 
 _atom_type_scat_dispersion_imag 
 _atom_type_scat_source 
 'C'  'C'   0.0033   0.0016 
 'International Tables Vol C Tables 4.2.6.8 and 6.1.1.4' 
 'H'  'H'   0.0000   0.0000 
 'International Tables Vol C Tables 4.2.6.8 and 6.1.1.4' 
 'Li'  'Li'  -0.0003   0.0001 
 'International Tables Vol C Tables 4.2.6.8 and 6.1.1.4' 
 'O'  'O'   0.0106   0.0060 
 'International Tables Vol C Tables 4.2.6.8 and 6.1.1.4' 
 'Si'  'Si'   0.0817   0.0704 
 'International Tables Vol C Tables 4.2.6.8 and 6.1.1.4' 
 'U'  'U'  -9.6767   9.6646 
 'International Tables Vol C Tables 4.2.6.8 and 6.1.1.4' 
 
_symmetry_cell_setting            Tetragonal
_symmetry_space_group_name_H-M    P4(2)/mmc 
 
loop_ 
 _symmetry_equiv_pos_as_xyz 
 'x, y, z' 
 '-x, -y, z' 
 '-y, x, z+1/2' 
 'y, -x, z+1/2' 
 '-x, y, -z' 
 'x, -y, -z' 
 'y, x, -z+1/2' 
 '-y, -x, -z+1/2' 
 '-x, -y, -z' 
 'x, y, -z' 
 'y, -x, -z-1/2' 
 '-y, x, -z-1/2' 
 'x, -y, z' 
 '-x, y, z' 
 '-y, -x, z-1/2' 
 'y, x, z-1/2' 
 
_cell_length_a                    12.3874(4) 
_cell_length_b                    12.3874(4) 
_cell_length_c                    19.4321(14) 
_cell_angle_alpha                 90.00 
_cell_angle_beta                  90.00 
_cell_angle_gamma                 90.00 
_cell_volume                      2981.8(3) 
_cell_formula_units_Z             2 
_cell_measurement_temperature     150(2) 
_cell_measurement_reflns_used     ? 
_cell_measurement_theta_min       ? 
_cell_measurement_theta_max       ? 
 
_exptl_crystal_description        block 
_exptl_crystal_colour             dark_red 
_exptl_crystal_size_max           1.0 
_exptl_crystal_size_mid           0.6 
_exptl_crystal_size_min           0.4 
_exptl_crystal_density_meas       ? 
_exptl_crystal_density_diffrn     1.177 
_exptl_crystal_density_method     'not measured' 
_exptl_crystal_F_000              1074 
_exptl_absorpt_coefficient_mu     2.840 
_exptl_absorpt_correction_type    'Empirical'
_exptl_absorpt_correction_T_min   0.190
_exptl_absorpt_correction_T_max   0.320 
_exptl_absorpt_process_details    'Psi Scan' 
 
_exptl_special_details 
; 
 ? 
; 
 
_diffrn_ambient_temperature       150(2) 
_diffrn_radiation_wavelength      0.71073 
_diffrn_radiation_type            MoK\a 
_diffrn_radiation_source          'fine-focus sealed tube' 
_diffrn_radiation_monochromator   graphite 
_diffrn_measurement_device_type   'CCD area detector'
_diffrn_measurement_method        'omega scan' 
_diffrn_detector_area_resol_mean  ? 
_diffrn_standards_number          ? 
_diffrn_standards_interval_count  ? 
_diffrn_standards_interval_time   ? 
_diffrn_standards_decay_%         ? 
_diffrn_reflns_number             23433 
_diffrn_reflns_av_R_equivalents   0.0961 
_diffrn_reflns_av_sigmaI/netI     0.0392 
_diffrn_reflns_limit_h_min        -15 
_diffrn_reflns_limit_h_max        15 
_diffrn_reflns_limit_k_min        -8 
_diffrn_reflns_limit_k_max        15 
_diffrn_reflns_limit_l_min        -22 
_diffrn_reflns_limit_l_max        24 
_diffrn_reflns_theta_min          2.10 
_diffrn_reflns_theta_max          27.42 
_reflns_number_total              1836 
_reflns_number_gt                 1253 
_reflns_threshold_expression      >2sigma(I) 
 
_computing_data_collection        ? 
_computing_cell_refinement        ? 
_computing_data_reduction         ? 
_computing_structure_solution     'SHELXS-97 (Sheldrick, 1990)' 
_computing_structure_refinement   'SHELXL-97 (Sheldrick, 1997)' 
_computing_molecular_graphics     ? 
_computing_publication_material   ? 
 
_refine_special_details 
; 
 Refinement of F^2^ against ALL reflections.  The weighted R-factor wR and 
 goodness of fit S are based on F^2^, conventional R-factors R are based 
 on F, with F set to zero for negative F^2^. The threshold expression of 
 F^2^ > 2sigma(F^2^) is used only for calculating R-factors(gt) etc. and is 
 not relevant to the choice of reflections for refinement.  R-factors based 
 on F^2^ are statistically about twice as large as those based on F, and R- 
 factors based on ALL data will be even larger. 
; 
 
_refine_ls_structure_factor_coef  Fsqd  
_refine_ls_matrix_type            full 
_refine_ls_weighting_scheme       calc  
_refine_ls_weighting_details 
 'calc w=1/[\s^2^(Fo^2^)+(0.0464P)^2^+5.6043P] where P=(Fo^2^+2Fc^2^)/3' 
_atom_sites_solution_primary      direct 
_atom_sites_solution_secondary    difmap 
_atom_sites_solution_hydrogens    none 
_refine_ls_hydrogen_treatment     none 
_refine_ls_extinction_method      none 
_refine_ls_extinction_coef        ? 
_refine_ls_number_reflns          1836 
_refine_ls_number_parameters      102 
_refine_ls_number_restraints      5 
_refine_ls_R_factor_all           0.0674 
_refine_ls_R_factor_gt            0.0392 
_refine_ls_wR_factor_ref          0.1099 
_refine_ls_wR_factor_gt           0.0973 
_refine_ls_goodness_of_fit_ref    1.177 
_refine_ls_restrained_S_all       1.210 
_refine_ls_shift/su_max           0.057 
_refine_ls_shift/su_mean          0.010 
 
loop_ 
 _atom_site_label 
 _atom_site_type_symbol 
 _atom_site_fract_x 
 _atom_site_fract_y 
 _atom_site_fract_z 
 _atom_site_U_iso_or_equiv 
 _atom_site_adp_type 
 _atom_site_occupancy 
 _atom_site_symmetry_multiplicity 
 _atom_site_calc_flag 
 _atom_site_refinement_flags 
 _atom_site_disorder_assembly 
 _atom_site_disorder_group 
U1 U 1.0000 0.5000 0.0000 0.02992(17) Uani 1 8 d S . . 
Si2 Si 1.0000 0.27486(19) 0.14440(11) 0.0500(5) Uani 1 2 d S . . 
O1 O 1.1657(6) 0.5000 0.0000 0.055(2) Uani 1 4 d S . . 
Li1 Li 0.5000 1.0000 0.0000 0.056(7) Uani 1 8 d S . . 
C1 C 1.2816(9) 0.5000 0.0000 0.065(4) Uani 1 4 d S . . 
C2A C 1.0000 0.4129(13) 0.1142(8) 0.053(4) Uani 0.50 2 d SP . . 
C2B C 1.0000 0.3184(13) 0.0555(8) 0.056(5) Uani 0.50 2 d SP . . 
C3A C 1.0000 0.2673(19) 0.2439(9) 0.098(8) Uani 0.50 2 d SP . . 
C3B C 1.0000 0.1181(16) 0.1489(10) 0.085(7) Uani 0.50 2 d SP . . 
C4B C 1.1222(14) 0.3152(13) 0.1917(8) 0.083(4) Uani 0.50 1 d P . . 
C4A C 1.1230(16) 0.2019(15) 0.1179(8) 0.115(7) Uani 0.50 1 d P . . 
C6 C 1.3171(13) 0.4017(15) 0.0378(13) 0.145(11) Uani 0.50 1 d P . . 
C5 C 1.320(2) 0.5000 0.0765(13) 0.094(8) Uani 0.50 2 d SP . . 
O10 O 0.5000 0.5000 0.2500 0.28(2) Uiso 1 8 d S . . 
C22 C 0.5000 0.388(4) 0.244(2) 0.204(19) Uiso 0.50 2 d SP . . 
C24 C 0.383(4) 0.383(4) 0.2500 0.28(3) Uiso 0.50 2 d SP . . 
C30 C 0.5000 1.184(3) 0.1120(18) 0.282(16) Uiso 1 2 d SD . . 
C32 C 0.282(2) 1.076(2) 0.0488(13) 0.167(10) Uiso 0.50 1 d PD . . 
O3 O 0.3299(13) 1.0290(15) 0.0000 0.106(6) Uiso 0.50 2 d SPD . . 
C31 C 0.361(5) 1.103(5) 0.112(3) 0.38(4) Uiso 0.50 1 d PD . . 
O2 O 0.4602(17) 1.1144(16) 0.0755(9) 0.177(8) Uiso 0.50 1 d PD . . 
 
loop_ 
 _atom_site_aniso_label 
 _atom_site_aniso_U_11 
 _atom_site_aniso_U_22 
 _atom_site_aniso_U_33 
 _atom_site_aniso_U_23 
 _atom_site_aniso_U_13 
 _atom_site_aniso_U_12 
U1 0.0304(4) 0.0275(3) 0.0319(3) 0.000 0.000 0.000 
Si2 0.0700(16) 0.0404(12) 0.0396(10) 0.0084(10) 0.000 0.000 
O1 0.030(4) 0.062(5) 0.073(6) 0.000 0.000 0.000 
Li1 0.042(17) 0.07(2) 0.053(15) 0.000 0.000 0.000 
C1 0.021(5) 0.056(8) 0.118(12) 0.000 0.000 0.000 
C2A 0.088(15) 0.028(8) 0.044(8) 0.008(7) 0.000 0.000 
C2B 0.086(13) 0.047(10) 0.033(8) 0.011(7) 0.000 0.000 
C3A 0.19(3) 0.071(15) 0.035(8) 0.011(10) 0.000 0.000 
C3B 0.13(2) 0.051(11) 0.069(12) 0.027(11) 0.000 0.000 
C4B 0.096(12) 0.075(10) 0.077(9) 0.007(8) -0.033(9) -0.004(9) 
C4A 0.147(17) 0.109(15) 0.087(11) 0.033(10) 0.033(11) 0.079(13) 
C6 0.042(8) 0.131(16) 0.26(3) 0.103(18) -0.008(12) 0.018(9) 
C5 0.060(14) 0.14(3) 0.083(16) 0.000 -0.029(13) 0.000 
 
_geom_special_details 
; 
 All esds (except the esd in the dihedral angle between two l.s. planes) 
 are estimated using the full covariance matrix.  The cell esds are taken 
 into account individually in the estimation of esds in distances, angles 
 and torsion angles; correlations between esds in cell parameters are only 
 used when they are defined by crystal symmetry.  An approximate (isotropic) 
 treatment of cell esds is used for estimating esds involving l.s. planes. 
; 
 
loop_ 
 _geom_bond_atom_site_label_1 
 _geom_bond_atom_site_label_2 
 _geom_bond_distance 
 _geom_bond_site_symmetry_2 
 _geom_bond_publ_flag 
U1 O1 2.053(8) . ? 
U1 O1 2.053(8) 9_765 ? 
U1 C2A 2.467(15) 10 ? 
U1 C2A 2.467(15) 2_765 ? 
U1 C2A 2.467(15) 9_765 ? 
U1 C2A 2.467(15) . ? 
U1 C2B 2.494(16) 10 ? 
U1 C2B 2.494(16) 2_765 ? 
U1 C2B 2.494(16) . ? 
U1 C2B 2.494(16) 9_765 ? 
Si2 C2A 1.809(15) . ? 
Si2 C2B 1.810(15) . ? 
Si2 C4B 1.840(16) . ? 
Si2 C4B 1.840(16) 14_755 ? 
Si2 C4A 1.845(16) 14_755 ? 
Si2 C4A 1.845(16) . ? 
Si2 C3A 1.935(17) . ? 
Si2 C3B 1.94(2) . ? 
O1 C1 1.436(13) . ? 
Li1 O2 2.099(19) 6_575 ? 
Li1 O2 2.099(19) 9_675 ? 
Li1 O2 2.099(19) 14_655 ? 
Li1 O2 2.099(19) 5_655 ? 
Li1 O2 2.099(19) 10 ? 
Li1 O2 2.099(19) 2_675 ? 
Li1 O2 2.099(19) . ? 
Li1 O2 2.099(19) 13_575 ? 
Li1 O3 2.137(16) 13_575 ? 
Li1 O3 2.137(16) 5_655 ? 
Li1 O3 2.137(16) 9_675 ? 
Li1 O3 2.137(16) . ? 
C1 C6 1.488(16) 10 ? 
C1 C6 1.488(16) 6_565 ? 
C1 C6 1.488(16) 13_565 ? 
C1 C6 1.488(16) . ? 
C1 C5 1.56(2) . ? 
C1 C5 1.56(2) 10 ? 
C2A C2B 1.63(2) . ? 
C3A C4B 1.92(2) 14_755 ? 
C3A C4B 1.92(2) . ? 
C3B C4A 1.94(2) . ? 
C3B C4A 1.94(2) 14_755 ? 
C4B C4A 2.01(2) . ? 
C6 C5 1.43(3) . ? 
C6 C6 1.47(5) 10 ? 
C5 C6 1.43(3) 13_565 ? 
O10 C22 1.39(5) 12_656 ? 
O10 C22 1.39(5) . ? 
O10 C22 1.39(5) 2_665 ? 
O10 C22 1.39(5) 11_566 ? 
C22 C24 1.46(5) 12_656 ? 
C22 C24 1.46(5) . ? 
C22 C22 1.97(6) 12_656 ? 
C22 C22 1.97(6) 11_566 ? 
C24 C22 1.46(5) 11_566 ? 
C30 O2 1.22(3) . ? 
C30 O2 1.22(3) 14_655 ? 
C30 C31 1.99(6) 14_655 ? 
C32 O3 1.26(3) . ? 
C32 C31 1.61(5) . ? 
C32 O3 1.72(3) 13_575 ? 
C32 C32 1.88(5) 13_575 ? 
C32 C32 1.90(5) 10 ? 
O3 O3 0.72(4) 13_575 ? 
O3 C32 1.26(3) 10 ? 
O3 C32 1.72(3) 6_575 ? 
O3 C32 1.72(3) 13_575 ? 
C31 O2 1.43(7) . ? 
O2 O2 0.99(4) 14_655 ? 
 
loop_ 
 _geom_angle_atom_site_label_1 
 _geom_angle_atom_site_label_2 
 _geom_angle_atom_site_label_3 
 _geom_angle 
 _geom_angle_site_symmetry_1 
 _geom_angle_site_symmetry_3 
 _geom_angle_publ_flag 
O1 U1 O1 180.0 . 9_765 ? 
O1 U1 C2A 90.000(1) . 10 ? 
O1 U1 C2A 90.000(1) 9_765 10 ? 
O1 U1 C2A 90.000(1) . 2_765 ? 
O1 U1 C2A 90.000(1) 9_765 2_765 ? 
C2A U1 C2A 180.0(3) 10 2_765 ? 
O1 U1 C2A 90.000(1) . 9_765 ? 
O1 U1 C2A 90.000(1) 9_765 9_765 ? 
C2A U1 C2A 51.8(7) 10 9_765 ? 
C2A U1 C2A 128.2(7) 2_765 9_765 ? 
O1 U1 C2A 90.000(1) . . ? 
O1 U1 C2A 90.000(1) 9_765 . ? 
C2A U1 C2A 128.2(7) 10 . ? 
C2A U1 C2A 51.8(7) 2_765 . ? 
C2A U1 C2A 180.0(7) 9_765 . ? 
O1 U1 C2B 90.000(1) . 10 ? 
O1 U1 C2B 90.000(1) 9_765 10 ? 
C2A U1 C2B 38.5(5) 10 10 ? 
C2A U1 C2B 141.5(5) 2_765 10 ? 
C2A U1 C2B 90.3(5) 9_765 10 ? 
C2A U1 C2B 89.7(5) . 10 ? 
O1 U1 C2B 90.000(1) . 2_765 ? 
O1 U1 C2B 90.000(1) 9_765 2_765 ? 
C2A U1 C2B 141.5(5) 10 2_765 ? 
C2A U1 C2B 38.5(5) 2_765 2_765 ? 
C2A U1 C2B 89.7(5) 9_765 2_765 ? 
C2A U1 C2B 90.3(5) . 2_765 ? 
C2B U1 C2B 180.0(7) 10 2_765 ? 
O1 U1 C2B 90.000(1) . . ? 
O1 U1 C2B 90.000(1) 9_765 . ? 
C2A U1 C2B 89.7(5) 10 . ? 
C2A U1 C2B 90.3(5) 2_765 . ? 
C2A U1 C2B 141.5(5) 9_765 . ? 
C2A U1 C2B 38.5(5) . . ? 
C2B U1 C2B 51.2(7) 10 . ? 
C2B U1 C2B 128.8(7) 2_765 . ? 
O1 U1 C2B 90.000(1) . 9_765 ? 
O1 U1 C2B 90.000(1) 9_765 9_765 ? 
C2A U1 C2B 90.3(5) 10 9_765 ? 
C2A U1 C2B 89.7(5) 2_765 9_765 ? 
C2A U1 C2B 38.5(5) 9_765 9_765 ? 
C2A U1 C2B 141.5(5) . 9_765 ? 
C2B U1 C2B 128.8(7) 10 9_765 ? 
C2B U1 C2B 51.2(7) 2_765 9_765 ? 
C2B U1 C2B 180.0(7) . 9_765 ? 
C2A Si2 C2B 53.7(7) . . ? 
C2A Si2 C4B 84.6(6) . . ? 
C2B Si2 C4B 113.3(6) . . ? 
C2A Si2 C4B 84.6(6) . 14_755 ? 
C2B Si2 C4B 113.3(6) . 14_755 ? 
C4B Si2 C4B 110.8(11) . 14_755 ? 
C2A Si2 C4A 111.9(6) . 14_755 ? 
C2B Si2 C4A 83.1(6) . 14_755 ? 
C4B Si2 C4A 162.2(7) . 14_755 ? 
C4B Si2 C4A 66.0(9) 14_755 14_755 ? 
C2A Si2 C4A 111.9(6) . . ? 
C2B Si2 C4A 83.1(6) . . ? 
C4B Si2 C4A 66.0(8) . . ? 
C4B Si2 C4A 162.2(7) 14_755 . ? 
C4A Si2 C4A 111.4(14) 14_755 . ? 
C2A Si2 C3A 111.7(9) . . ? 
C2B Si2 C3A 165.4(9) . . ? 
C4B Si2 C3A 61.0(6) . . ? 
C4B Si2 C3A 61.0(6) 14_755 . ? 
C4A Si2 C3A 104.8(6) 14_755 . ? 
C4A Si2 C3A 104.8(6) . . ? 
C2A Si2 C3B 163.6(8) . . ? 
C2B Si2 C3B 109.9(8) . . ? 
C4B Si2 C3B 104.4(6) . . ? 
C4B Si2 C3B 104.4(6) 14_755 . ? 
C4A Si2 C3B 61.5(7) 14_755 . ? 
C4A Si2 C3B 61.5(7) . . ? 
C3A Si2 C3B 84.6(9) . . ? 
C1 O1 U1 180.0 . . ? 
O2 Li1 O2 27.2(12) 6_575 9_675 ? 
O2 Li1 O2 180.0(7) 6_575 14_655 ? 
O2 Li1 O2 152.8(12) 9_675 14_655 ? 
O2 Li1 O2 91.2(9) 6_575 5_655 ? 
O2 Li1 O2 84.9(10) 9_675 5_655 ? 
O2 Li1 O2 88.8(10) 14_655 5_655 ? 
O2 Li1 O2 84.9(10) 6_575 10 ? 
O2 Li1 O2 91.2(10) 9_675 10 ? 
O2 Li1 O2 95.1(10) 14_655 10 ? 
O2 Li1 O2 27.2(12) 5_655 10 ? 
O2 Li1 O2 95.1(10) 6_575 2_675 ? 
O2 Li1 O2 88.8(10) 9_675 2_675 ? 
O2 Li1 O2 84.9(10) 14_655 2_675 ? 
O2 Li1 O2 152.8(12) 5_655 2_675 ? 
O2 Li1 O2 180.0(11) 10 2_675 ? 
O2 Li1 O2 152.8(12) 6_575 . ? 
O2 Li1 O2 180.000(3) 9_675 . ? 
O2 Li1 O2 27.2(12) 14_655 . ? 
O2 Li1 O2 95.1(10) 5_655 . ? 
O2 Li1 O2 88.8(10) 10 . ? 
O2 Li1 O2 91.2(9) 2_675 . ? 
O2 Li1 O2 88.8(10) 6_575 13_575 ? 
O2 Li1 O2 95.1(10) 9_675 13_575 ? 
O2 Li1 O2 91.2(10) 14_655 13_575 ? 
O2 Li1 O2 180.000(2) 5_655 13_575 ? 
O2 Li1 O2 152.8(12) 10 13_575 ? 
O2 Li1 O2 27.2(12) 2_675 13_575 ? 
O2 Li1 O2 84.9(10) . 13_575 ? 
O2 Li1 O3 69.8(7) 6_575 13_575 ? 
O2 Li1 O3 96.8(7) 9_675 13_575 ? 
O2 Li1 O3 110.2(7) 14_655 13_575 ? 
O2 Li1 O3 110.2(7) 5_655 13_575 ? 
O2 Li1 O3 83.2(7) 10 13_575 ? 
O2 Li1 O3 96.8(7) 2_675 13_575 ? 
O2 Li1 O3 83.2(7) . 13_575 ? 
O2 Li1 O3 69.8(7) 13_575 13_575 ? 
O2 Li1 O3 110.2(7) 6_575 5_655 ? 
O2 Li1 O3 83.2(7) 9_675 5_655 ? 
O2 Li1 O3 69.8(7) 14_655 5_655 ? 
O2 Li1 O3 69.8(7) 5_655 5_655 ? 
O2 Li1 O3 96.8(7) 10 5_655 ? 
O2 Li1 O3 83.2(7) 2_675 5_655 ? 
O2 Li1 O3 96.8(7) . 5_655 ? 
O2 Li1 O3 110.2(7) 13_575 5_655 ? 
O3 Li1 O3 180.000(1) 13_575 5_655 ? 
O2 Li1 O3 96.8(7) 6_575 9_675 ? 
O2 Li1 O3 69.8(7) 9_675 9_675 ? 
O2 Li1 O3 83.2(7) 14_655 9_675 ? 
O2 Li1 O3 83.2(7) 5_655 9_675 ? 
O2 Li1 O3 110.2(7) 10 9_675 ? 
O2 Li1 O3 69.8(7) 2_675 9_675 ? 
O2 Li1 O3 110.2(7) . 9_675 ? 
O2 Li1 O3 96.8(7) 13_575 9_675 ? 
O3 Li1 O3 160.6(10) 13_575 9_675 ? 
O3 Li1 O3 19.4(10) 5_655 9_675 ? 
O2 Li1 O3 83.2(7) 6_575 . ? 
O2 Li1 O3 110.2(7) 9_675 . ? 
O2 Li1 O3 96.8(7) 14_655 . ? 
O2 Li1 O3 96.8(7) 5_655 . ? 
O2 Li1 O3 69.8(7) 10 . ? 
O2 Li1 O3 110.2(7) 2_675 . ? 
O2 Li1 O3 69.8(7) . . ? 
O2 Li1 O3 83.2(7) 13_575 . ? 
O3 Li1 O3 19.4(10) 13_575 . ? 
O3 Li1 O3 160.6(10) 5_655 . ? 
O3 Li1 O3 180.0 9_675 . ? 
O1 C1 C6 107.2(8) . 10 ? 
O1 C1 C6 107.2(8) . 6_565 ? 
C6 C1 C6 109.7(19) 10 6_565 ? 
O1 C1 C6 107.2(8) . 13_565 ? 
C6 C1 C6 145.6(15) 10 13_565 ? 
C6 C1 C6 59(2) 6_565 13_565 ? 
O1 C1 C6 107.2(8) . . ? 
C6 C1 C6 59(2) 10 . ? 
C6 C1 C6 145.6(15) 6_565 . ? 
C6 C1 C6 109.7(19) 13_565 . ? 
O1 C1 C5 107.9(10) . . ? 
C6 C1 C5 112.3(11) 10 . ? 
C6 C1 C5 112.3(11) 6_565 . ? 
C6 C1 C5 55.9(10) 13_565 . ? 
C6 C1 C5 55.9(10) . . ? 
O1 C1 C5 107.9(10) . 10 ? 
C6 C1 C5 55.9(10) 10 10 ? 
C6 C1 C5 55.9(10) 6_565 10 ? 
C6 C1 C5 112.3(11) 13_565 10 ? 
C6 C1 C5 112.3(11) . 10 ? 
C5 C1 C5 144(2) . 10 ? 
C2B C2A Si2 63.2(8) . . ? 
C2B C2A U1 71.7(7) . . ? 
Si2 C2A U1 134.9(8) . . ? 
C2A C2B Si2 63.1(7) . . ? 
C2A C2B U1 69.9(8) . . ? 
Si2 C2B U1 133.0(8) . . ? 
C4B C3A C4B 104.3(12) 14_755 . ? 
C4B C3A Si2 57.1(6) 14_755 . ? 
C4B C3A Si2 57.1(6) . . ? 
C4A C3B C4A 103.5(12) . 14_755 ? 
C4A C3B Si2 56.7(7) . . ? 
C4A C3B Si2 56.7(7) 14_755 . ? 
Si2 C4B C3A 62.0(7) . . ? 
Si2 C4B C4A 57.1(7) . . ? 
C3A C4B C4A 99.5(11) . . ? 
Si2 C4A C3B 61.7(8) . . ? 
Si2 C4A C4B 56.9(7) . . ? 
C3B C4A C4B 98.5(11) . . ? 
C5 C6 C6 121.7(13) . 10 ? 
C5 C6 C1 64.7(11) . . ? 
C6 C6 C1 60.4(10) 10 . ? 
C6 C5 C6 117(3) . 13_565 ? 
C6 C5 C1 59.4(12) . . ? 
C6 C5 C1 59.4(12) 13_565 . ? 
C22 O10 C22 90.4(3) 12_656 . ? 
C22 O10 C22 90.4(3) 12_656 2_665 ? 
C22 O10 C22 170(4) . 2_665 ? 
C22 O10 C22 170(4) 12_656 11_566 ? 
C22 O10 C22 90.4(3) . 11_566 ? 
C22 O10 C22 90.4(3) 2_665 11_566 ? 
O10 C22 C24 92(3) . 12_656 ? 
O10 C22 C24 92(3) . . ? 
C24 C22 C24 169(4) 12_656 . ? 
O10 C22 C22 44.79(17) . 12_656 ? 
C24 C22 C22 48(3) 12_656 12_656 ? 
C24 C22 C22 136(3) . 12_656 ? 
O10 C22 C22 44.79(16) . 11_566 ? 
C24 C22 C22 136(3) 12_656 11_566 ? 
C24 C22 C22 47(3) . 11_566 ? 
C22 C22 C22 89.2(7) 12_656 11_566 ? 
C22 C24 C22 85(5) 11_566 . ? 
O2 C30 O2 48(2) . 14_655 ? 
O2 C30 C31 90(3) . 14_655 ? 
O2 C30 C31 45(2) 14_655 14_655 ? 
O3 C32 C31 112(4) . . ? 
O3 C32 O3 21.8(13) . 13_575 ? 
C31 C32 O3 112(3) . 13_575 ? 
O3 C32 C32 62.6(15) . 13_575 ? 
C31 C32 C32 102(3) . 13_575 ? 
O3 C32 C32 40.7(9) 13_575 13_575 ? 
O3 C32 C32 41.3(14) . 10 ? 
C31 C32 C32 140(3) . 10 ? 
O3 C32 C32 56.5(9) 13_575 10 ? 
C32 C32 C32 90.000(1) 13_575 10 ? 
O3 O3 C32 117.4(15) 13_575 . ? 
O3 O3 C32 117.4(15) 13_575 10 ? 
C32 O3 C32 97(3) . 10 ? 
O3 O3 C32 40.7(9) 13_575 6_575 ? 
C32 O3 C32 127(3) . 6_575 ? 
C32 O3 C32 77(2) 10 6_575 ? 
O3 O3 C32 40.7(9) 13_575 13_575 ? 
C32 O3 C32 77(2) . 13_575 ? 
C32 O3 C32 127(3) 10 13_575 ? 
C32 O3 C32 67.1(18) 6_575 13_575 ? 
O3 O3 Li1 80.3(5) 13_575 . ? 
C32 O3 Li1 122.9(16) . . ? 
C32 O3 Li1 122.9(16) 10 . ? 
C32 O3 Li1 102.4(12) 6_575 . ? 
C32 O3 Li1 102.4(12) 13_575 . ? 
O2 C31 C32 100(4) . . ? 
O2 O2 C30 66.2(12) 14_655 . ? 
O2 O2 C31 149(3) 14_655 . ? 
C30 O2 C31 97(3) . . ? 
O2 O2 Li1 76.4(6) 14_655 . ? 
C30 O2 Li1 142.0(18) . . ? 
C31 O2 Li1 119(3) . . ? 
 
_diffrn_measured_fraction_theta_max    0.961 
_diffrn_reflns_theta_full              27.42 
_diffrn_measured_fraction_theta_full   0.961 
_refine_diff_density_max    0.767 
_refine_diff_density_min   -1.039 
_refine_diff_density_rms    0.115 


########################################################END##############################################################


 
data_Complex_5 
 
_audit_creation_method            SHELXL-97 
_chemical_name_systematic 
; 
 ? 
; 
_chemical_name_common             ? 
_chemical_melting_point           ? 
_chemical_formula_moiety          ? 
_chemical_formula_sum 
 'C20 H48 Cl4 Li O8 U' 
_chemical_formula_weight          803.35 
 
loop_ 
 _atom_type_symbol 
 _atom_type_description 
 _atom_type_scat_dispersion_real 
 _atom_type_scat_dispersion_imag 
 _atom_type_scat_source 
 'C'  'C'   0.0033   0.0016 
 'International Tables Vol C Tables 4.2.6.8 and 6.1.1.4' 
 'H'  'H'   0.0000   0.0000 
 'International Tables Vol C Tables 4.2.6.8 and 6.1.1.4' 
 'Li'  'Li'  -0.0003   0.0001 
 'International Tables Vol C Tables 4.2.6.8 and 6.1.1.4' 
 'O'  'O'   0.0106   0.0060 
 'International Tables Vol C Tables 4.2.6.8 and 6.1.1.4' 
 'Cl'  'Cl'   0.1484   0.1585 
 'International Tables Vol C Tables 4.2.6.8 and 6.1.1.4' 
 'U'  'U'  -9.6767   9.6646 
 'International Tables Vol C Tables 4.2.6.8 and 6.1.1.4' 
 
_symmetry_cell_setting            Monoclinic 
_symmetry_space_group_name_H-M    P2(1)/c 
 
loop_ 
 _symmetry_equiv_pos_as_xyz 
 'x, y, z' 
 '-x, y+1/2, -z+1/2' 
 '-x, -y, -z' 
 'x, -y-1/2, z-1/2' 
 
_cell_length_a                    11.0534(16) 
_cell_length_b                    15.790(2) 
_cell_length_c                    19.038(3) 
_cell_angle_alpha                 90.00 
_cell_angle_beta                  92.248(2) 
_cell_angle_gamma                 90.00 
_cell_volume                      3320.2(8) 
_cell_formula_units_Z             4 
_cell_measurement_temperature     150(2) 
_cell_measurement_reflns_used     ? 
_cell_measurement_theta_min       ? 
_cell_measurement_theta_max       ? 
 
_exptl_crystal_description        irregular 
_exptl_crystal_colour             pale_green
_exptl_crystal_size_max           0.9 
_exptl_crystal_size_mid           0.6 
_exptl_crystal_size_min           0.25 
_exptl_crystal_density_meas       ? 
_exptl_crystal_density_diffrn     1.607 
_exptl_crystal_density_method     'not measured' 
_exptl_crystal_F_000              1580 
_exptl_absorpt_coefficient_mu     5.245 
_exptl_absorpt_correction_type    'Empirical' 
_exptl_absorpt_correction_T_min   0.162 
_exptl_absorpt_correction_T_max   0.398 
_exptl_absorpt_process_details    'Psi Scan' 
 
_exptl_special_details 
; 
 ? 
; 
 
_diffrn_ambient_temperature       150(2) 
_diffrn_radiation_wavelength      0.71073 
_diffrn_radiation_type            MoK\a 
_diffrn_radiation_source          'fine-focus sealed tube' 
_diffrn_radiation_monochromator   graphite 
_diffrn_measurement_device_type   'CCD area detector'
_diffrn_measurement_method        'omega scan'
_diffrn_detector_area_resol_mean  ? 
_diffrn_standards_number          ? 
_diffrn_standards_interval_count  ? 
_diffrn_standards_interval_time   ? 
_diffrn_standards_decay_%         ? 
_diffrn_reflns_number             27237 
_diffrn_reflns_av_R_equivalents   0.1102 
_diffrn_reflns_av_sigmaI/netI     0.0674 
_diffrn_reflns_limit_h_min        -13 
_diffrn_reflns_limit_h_max        13 
_diffrn_reflns_limit_k_min        -19 
_diffrn_reflns_limit_k_max        19 
_diffrn_reflns_limit_l_min        -24 
_diffrn_reflns_limit_l_max        23 
_diffrn_reflns_theta_min          1.68 
_diffrn_reflns_theta_max          26.73 
_reflns_number_total              6769 
_reflns_number_gt                 5344 
_reflns_threshold_expression      >2sigma(I) 
 
_computing_data_collection        ? 
_computing_cell_refinement        ? 
_computing_data_reduction         ? 
_computing_structure_solution     'SHELXS-97 (Sheldrick, 1990)' 
_computing_structure_refinement   'SHELXL-97 (Sheldrick, 1997)' 
_computing_molecular_graphics     ? 
_computing_publication_material   ? 
 
_refine_special_details 
; 
 Refinement of F^2^ against ALL reflections.  The weighted R-factor wR and 
 goodness of fit S are based on F^2^, conventional R-factors R are based 
 on F, with F set to zero for negative F^2^. The threshold expression of 
 F^2^ > 2sigma(F^2^) is used only for calculating R-factors(gt) etc. and is 
 not relevant to the choice of reflections for refinement.  R-factors based 
 on F^2^ are statistically about twice as large as those based on F, and R- 
 factors based on ALL data will be even larger. 
; 
 
_refine_ls_structure_factor_coef  Fsqd  
_refine_ls_matrix_type            full 
_refine_ls_weighting_scheme       calc  
_refine_ls_weighting_details 
 'calc w=1/[\s^2^(Fo^2^)+(0.0454P)^2^+0.0000P] where P=(Fo^2^+2Fc^2^)/3' 
_atom_sites_solution_primary      direct 
_atom_sites_solution_secondary    difmap 
_atom_sites_solution_hydrogens    geom 
_refine_ls_hydrogen_treatment     constr 
_refine_ls_extinction_method      none 
_refine_ls_extinction_coef        ? 
_refine_ls_number_reflns          6769 
_refine_ls_number_parameters      319 
_refine_ls_number_restraints      0 
_refine_ls_R_factor_all           0.0503 
_refine_ls_R_factor_gt            0.0350 
_refine_ls_wR_factor_ref          0.0922 
_refine_ls_wR_factor_gt           0.0856 
_refine_ls_goodness_of_fit_ref    1.001 
_refine_ls_restrained_S_all       1.001 
_refine_ls_shift/su_max           0.001 
_refine_ls_shift/su_mean          0.000 
 
loop_ 
 _atom_site_label 
 _atom_site_type_symbol 
 _atom_site_fract_x 
 _atom_site_fract_y 
 _atom_site_fract_z 
 _atom_site_U_iso_or_equiv 
 _atom_site_adp_type 
 _atom_site_occupancy 
 _atom_site_symmetry_multiplicity 
 _atom_site_calc_flag 
 _atom_site_refinement_flags 
 _atom_site_disorder_assembly 
 _atom_site_disorder_group 
U1 U 0.241196(14) 0.729846(12) 0.239172(9) 0.02364(8) Uani 1 1 d . . . 
Cl1 Cl 0.21715(11) 0.81751(9) 0.12408(7) 0.0369(3) Uani 1 1 d . . . 
Cl2 Cl 0.27667(12) 0.64227(9) 0.35336(7) 0.0396(3) Uani 1 1 d . . . 
Cl3 Cl 0.45161(11) 0.79982(11) 0.26249(7) 0.0431(3) Uani 1 1 d . . . 
Cl4 Cl 0.02933(11) 0.66040(9) 0.21724(7) 0.0376(3) Uani 1 1 d . . . 
O7 O 0.1360(3) 0.2038(2) 0.50338(18) 0.0329(8) Uani 1 1 d . . . 
O6 O 0.4016(3) 0.2626(3) 0.4777(2) 0.0398(9) Uani 1 1 d . . . 
O2 O 0.1700(3) 0.8244(2) 0.29199(17) 0.0301(8) Uani 1 1 d . . . 
O5 O 0.2289(3) 0.3510(2) 0.40649(17) 0.0318(8) Uani 1 1 d . . . 
O1 O 0.3167(3) 0.6378(2) 0.18652(18) 0.0334(8) Uani 1 1 d . . . 
O8 O 0.0532(3) 0.3624(2) 0.52971(18) 0.0336(8) Uani 1 1 d . . . 
O4 O 0.2797(3) 0.3057(3) 0.62054(19) 0.0449(10) Uani 1 1 d . . . 
C18 C 0.0118(5) 0.2247(4) 0.4869(3) 0.0347(13) Uani 1 1 d . . . 
H18A H -0.0386 0.1749 0.4917 0.042 Uiso 1 1 calc R . . 
H18B H 0.0028 0.2447 0.4389 0.042 Uiso 1 1 calc R . . 
O3 O 0.3140(4) 0.4378(3) 0.5428(2) 0.0513(11) Uani 1 1 d . . . 
C15 C 0.4337(5) 0.3102(4) 0.4188(3) 0.0444(14) Uani 1 1 d . . . 
H15A H 0.4991 0.2820 0.3955 0.053 Uiso 1 1 calc R . . 
H15B H 0.4622 0.3657 0.4339 0.053 Uiso 1 1 calc R . . 
C2 C 0.1596(4) 0.9062(3) 0.3268(2) 0.0272(11) Uani 1 1 d . . . 
C16 C 0.5018(6) 0.2444(5) 0.5239(4) 0.0566(19) Uani 1 1 d . . . 
H16A H 0.5600 0.2114 0.4997 0.085 Uiso 1 1 calc R . . 
H16B H 0.4748 0.2130 0.5636 0.085 Uiso 1 1 calc R . . 
H16C H 0.5385 0.2964 0.5399 0.085 Uiso 1 1 calc R . . 
C19 C -0.0260(4) 0.2919(4) 0.5364(3) 0.0357(13) Uani 1 1 d . . . 
H19A H -0.1089 0.3089 0.5251 0.043 Uiso 1 1 calc R . . 
H19B H -0.0215 0.2708 0.5842 0.043 Uiso 1 1 calc R . . 
C9 C 0.3223(5) 0.5109(3) 0.5009(3) 0.0405(13) Uani 1 1 d . . . 
H9A H 0.2764 0.5559 0.5209 0.061 Uiso 1 1 calc R . . 
H9B H 0.2906 0.4990 0.4543 0.061 Uiso 1 1 calc R . . 
H9C H 0.4055 0.5278 0.4989 0.061 Uiso 1 1 calc R . . 
C6 C 0.0270(5) 0.9191(3) 0.3412(3) 0.0377(13) Uani 1 1 d . . . 
H6A H -0.0205 0.9137 0.2982 0.057 Uiso 1 1 calc R . . 
H6B H 0.0157 0.9746 0.3605 0.057 Uiso 1 1 calc R . . 
H6C H 0.0018 0.8773 0.3742 0.057 Uiso 1 1 calc R . . 
C20 C 0.0210(5) 0.4293(4) 0.5752(3) 0.0433(14) Uani 1 1 d . . . 
H20A H -0.0589 0.4490 0.5622 0.065 Uiso 1 1 calc R . . 
H20B H 0.0776 0.4751 0.5714 0.065 Uiso 1 1 calc R . . 
H20C H 0.0226 0.4092 0.6228 0.065 Uiso 1 1 calc R . . 
C10 C 0.3620(6) 0.4436(5) 0.6107(3) 0.0606(19) Uani 1 1 d . . . 
H10A H 0.3345 0.4959 0.6314 0.073 Uiso 1 1 calc R . . 
H10B H 0.4495 0.4463 0.6091 0.073 Uiso 1 1 calc R . . 
C14 C 0.3296(5) 0.3197(4) 0.3694(3) 0.0451(15) Uani 1 1 d . . . 
H14A H 0.3492 0.3589 0.3323 0.054 Uiso 1 1 calc R . . 
H14B H 0.3093 0.2655 0.3481 0.054 Uiso 1 1 calc R . . 
C1 C 0.3611(5) 0.5604(3) 0.1551(3) 0.0354(12) Uani 1 1 d . . . 
Li1 Li 0.2339(7) 0.3213(5) 0.5152(4) 0.0248(17) Uani 1 1 d . . . 
C12 C 0.2373(6) 0.2407(4) 0.6646(3) 0.0484(16) Uani 1 1 d . . . 
H12A H 0.3023 0.2219 0.6958 0.073 Uiso 1 1 calc R . . 
H12B H 0.2085 0.1940 0.6363 0.073 Uiso 1 1 calc R . . 
H12C H 0.1725 0.2621 0.6916 0.073 Uiso 1 1 calc R . . 
C7 C 0.2041(5) 0.9737(4) 0.2766(3) 0.0413(13) Uani 1 1 d . . . 
H7A H 0.2868 0.9625 0.2662 0.062 Uiso 1 1 calc R . . 
H7B H 0.1983 1.0284 0.2981 0.062 Uiso 1 1 calc R . . 
H7C H 0.1550 0.9726 0.2338 0.062 Uiso 1 1 calc R . . 
C13 C 0.1295(5) 0.3740(4) 0.3605(3) 0.0401(13) Uani 1 1 d . . . 
H13A H 0.1511 0.4224 0.3331 0.060 Uiso 1 1 calc R . . 
H13B H 0.0608 0.3877 0.3877 0.060 Uiso 1 1 calc R . . 
H13C H 0.1095 0.3275 0.3297 0.060 Uiso 1 1 calc R . . 
C11 C 0.3294(8) 0.3736(4) 0.6552(3) 0.069(2) Uani 1 1 d . . . 
H11A H 0.4014 0.3549 0.6815 0.082 Uiso 1 1 calc R . . 
H11B H 0.2724 0.3939 0.6887 0.082 Uiso 1 1 calc R . . 
C5 C 0.4924(6) 0.5755(5) 0.1399(4) 0.069(2) Uani 1 1 d . . . 
H5A H 0.4986 0.6233 0.1092 0.104 Uiso 1 1 calc R . . 
H5B H 0.5247 0.5262 0.1178 0.104 Uiso 1 1 calc R . . 
H5C H 0.5374 0.5865 0.1831 0.104 Uiso 1 1 calc R . . 
C8 C 0.2388(5) 0.9026(4) 0.3936(3) 0.0395(13) Uani 1 1 d . . . 
H8A H 0.2142 0.8559 0.4219 0.059 Uiso 1 1 calc R . . 
H8B H 0.2305 0.9544 0.4193 0.059 Uiso 1 1 calc R . . 
H8C H 0.3218 0.8953 0.3817 0.059 Uiso 1 1 calc R . . 
C17 C 0.1746(5) 0.1355(4) 0.4615(4) 0.0487(15) Uani 1 1 d . . . 
H17A H 0.1287 0.0857 0.4719 0.073 Uiso 1 1 calc R . . 
H17B H 0.2590 0.1248 0.4715 0.073 Uiso 1 1 calc R . . 
H17C H 0.1622 0.1496 0.4127 0.073 Uiso 1 1 calc R . . 
C4 C 0.2871(7) 0.5464(6) 0.0891(4) 0.078(2) Uani 1 1 d . . . 
H4A H 0.2048 0.5349 0.1004 0.116 Uiso 1 1 calc R . . 
H4B H 0.3190 0.4990 0.0642 0.116 Uiso 1 1 calc R . . 
H4C H 0.2897 0.5961 0.0602 0.116 Uiso 1 1 calc R . . 
C3 C 0.3445(9) 0.4910(5) 0.2088(5) 0.093(3) Uani 1 1 d . . . 
H3A H 0.3994 0.5000 0.2484 0.140 Uiso 1 1 calc R . . 
H3B H 0.3609 0.4370 0.1879 0.140 Uiso 1 1 calc R . . 
H3C H 0.2628 0.4918 0.2240 0.140 Uiso 1 1 calc R . . 
 
loop_ 
 _atom_site_aniso_label 
 _atom_site_aniso_U_11 
 _atom_site_aniso_U_22 
 _atom_site_aniso_U_33 
 _atom_site_aniso_U_23 
 _atom_site_aniso_U_13 
 _atom_site_aniso_U_12 
U1 0.01982(10) 0.02984(13) 0.02138(11) 0.00133(7) 0.00248(7) 0.00052(7) 
Cl1 0.0363(7) 0.0439(8) 0.0301(7) 0.0111(6) -0.0022(5) -0.0056(6) 
Cl2 0.0365(7) 0.0548(9) 0.0276(7) 0.0137(6) 0.0040(5) 0.0056(6) 
Cl3 0.0214(6) 0.0710(10) 0.0370(7) 0.0015(7) 0.0020(5) -0.0123(6) 
Cl4 0.0282(6) 0.0410(8) 0.0433(8) 0.0006(6) -0.0015(6) -0.0106(5) 
O7 0.0300(18) 0.037(2) 0.031(2) -0.0015(16) -0.0057(15) 0.0038(16) 
O6 0.0276(19) 0.059(3) 0.033(2) -0.0009(18) 0.0004(17) 0.0073(18) 
O2 0.0273(17) 0.032(2) 0.0308(19) -0.0042(15) 0.0049(15) 0.0003(15) 
O5 0.0254(17) 0.046(2) 0.0242(18) -0.0004(15) 0.0027(14) 0.0045(16) 
O1 0.0348(19) 0.038(2) 0.0276(18) 0.0001(15) 0.0019(15) 0.0109(16) 
O8 0.0289(18) 0.041(2) 0.031(2) -0.0035(16) 0.0052(15) 0.0022(16) 
O4 0.050(2) 0.062(3) 0.0230(19) 0.0036(19) -0.0012(17) -0.020(2) 
C18 0.027(3) 0.046(4) 0.031(3) 0.003(2) -0.001(2) -0.004(2) 
O3 0.084(3) 0.032(2) 0.036(2) 0.0017(18) -0.023(2) -0.006(2) 
C15 0.031(3) 0.065(4) 0.038(3) 0.004(3) 0.013(2) 0.006(3) 
C2 0.029(3) 0.028(3) 0.025(3) -0.001(2) 0.004(2) 0.000(2) 
C16 0.036(3) 0.088(5) 0.045(4) -0.012(3) -0.010(3) 0.028(3) 
C19 0.023(2) 0.052(4) 0.032(3) 0.005(2) 0.003(2) -0.003(2) 
C9 0.042(3) 0.033(3) 0.046(3) 0.002(2) 0.002(3) -0.003(3) 
C6 0.035(3) 0.036(3) 0.042(3) -0.002(2) 0.008(2) 0.003(2) 
C20 0.038(3) 0.044(4) 0.048(4) -0.003(3) 0.008(3) 0.009(3) 
C10 0.067(4) 0.079(5) 0.035(3) -0.010(3) -0.009(3) -0.032(4) 
C14 0.040(3) 0.068(4) 0.028(3) -0.001(3) 0.009(2) 0.012(3) 
C1 0.042(3) 0.027(3) 0.037(3) -0.005(2) 0.002(2) 0.006(2) 
Li1 0.025(4) 0.028(4) 0.021(4) -0.004(3) 0.000(3) 0.003(3) 
C12 0.040(3) 0.067(4) 0.038(3) 0.021(3) -0.003(3) 0.003(3) 
C7 0.050(3) 0.033(3) 0.041(3) 0.007(2) 0.009(3) -0.003(3) 
C13 0.037(3) 0.050(4) 0.033(3) 0.007(3) -0.003(2) 0.001(3) 
C11 0.130(7) 0.041(4) 0.032(3) -0.006(3) -0.029(4) 0.013(4) 
C5 0.043(4) 0.090(6) 0.075(5) -0.021(4) 0.004(3) 0.023(4) 
C8 0.038(3) 0.046(3) 0.034(3) -0.005(3) -0.002(2) -0.004(3) 
C17 0.048(3) 0.034(3) 0.064(4) -0.009(3) -0.003(3) 0.002(3) 
C4 0.071(5) 0.090(6) 0.071(5) -0.037(5) -0.002(4) -0.013(4) 
C3 0.153(9) 0.041(4) 0.089(6) 0.022(4) 0.029(6) 0.016(5) 
 
_geom_special_details 
; 
 All esds (except the esd in the dihedral angle between two l.s. planes) 
 are estimated using the full covariance matrix.  The cell esds are taken 
 into account individually in the estimation of esds in distances, angles 
 and torsion angles; correlations between esds in cell parameters are only 
 used when they are defined by crystal symmetry.  An approximate (isotropic) 
 treatment of cell esds is used for estimating esds involving l.s. planes. 
; 
 
loop_ 
 _geom_bond_atom_site_label_1 
 _geom_bond_atom_site_label_2 
 _geom_bond_distance 
 _geom_bond_site_symmetry_2 
 _geom_bond_publ_flag 
U1 O1 1.970(3) . ? 
U1 O2 1.980(3) . ? 
U1 Cl2 2.5932(13) . ? 
U1 Cl1 2.5966(13) . ? 
U1 Cl3 2.5974(13) . ? 
U1 Cl4 2.6047(12) . ? 
O7 C17 1.418(7) . ? 
O7 C18 1.434(6) . ? 
O7 Li1 2.154(9) . ? 
O6 C15 1.407(7) . ? 
O6 C16 1.418(7) . ? 
O6 Li1 2.216(8) . ? 
O2 C2 1.458(6) . ? 
O5 C13 1.425(6) . ? 
O5 C14 1.429(6) . ? 
O5 Li1 2.121(8) . ? 
O1 C1 1.453(6) . ? 
O8 C20 1.420(6) . ? 
O8 C19 1.425(6) . ? 
O8 Li1 2.128(8) . ? 
O4 C11 1.364(7) . ? 
O4 C12 1.416(7) . ? 
O4 Li1 2.064(8) . ? 
C18 C19 1.490(8) . ? 
O3 C10 1.380(7) . ? 
O3 C9 1.410(6) . ? 
O3 Li1 2.099(9) . ? 
C15 C14 1.465(8) . ? 
C2 C6 1.515(7) . ? 
C2 C8 1.517(7) . ? 
C2 C7 1.525(7) . ? 
C10 C11 1.446(9) . ? 
C1 C4 1.489(9) . ? 
C1 C5 1.510(8) . ? 
C1 C3 1.515(8) . ? 
 
loop_ 
 _geom_angle_atom_site_label_1 
 _geom_angle_atom_site_label_2 
 _geom_angle_atom_site_label_3 
 _geom_angle 
 _geom_angle_site_symmetry_1 
 _geom_angle_site_symmetry_3 
 _geom_angle_publ_flag 
O1 U1 O2 178.23(13) . . ? 
O1 U1 Cl2 88.85(11) . . ? 
O2 U1 Cl2 91.51(10) . . ? 
O1 U1 Cl1 89.73(10) . . ? 
O2 U1 Cl1 89.83(10) . . ? 
Cl2 U1 Cl1 177.17(4) . . ? 
O1 U1 Cl3 90.36(11) . . ? 
O2 U1 Cl3 87.91(10) . . ? 
Cl2 U1 Cl3 88.78(5) . . ? 
Cl1 U1 Cl3 88.78(4) . . ? 
O1 U1 Cl4 90.23(11) . . ? 
O2 U1 Cl4 91.49(10) . . ? 
Cl2 U1 Cl4 90.88(4) . . ? 
Cl1 U1 Cl4 91.58(4) . . ? 
Cl3 U1 Cl4 179.30(4) . . ? 
C17 O7 C18 111.0(4) . . ? 
C17 O7 Li1 123.6(4) . . ? 
C18 O7 Li1 107.3(4) . . ? 
C15 O6 C16 112.8(5) . . ? 
C15 O6 Li1 105.9(4) . . ? 
C16 O6 Li1 121.8(4) . . ? 
C2 O2 U1 159.8(3) . . ? 
C13 O5 C14 112.4(4) . . ? 
C13 O5 Li1 130.2(4) . . ? 
C14 O5 Li1 114.5(4) . . ? 
C1 O1 U1 170.4(3) . . ? 
C20 O8 C19 110.9(4) . . ? 
C20 O8 Li1 124.4(4) . . ? 
C19 O8 Li1 110.9(4) . . ? 
C11 O4 C12 114.8(5) . . ? 
C11 O4 Li1 117.0(4) . . ? 
C12 O4 Li1 126.0(4) . . ? 
O7 C18 C19 108.4(4) . . ? 
C10 O3 C9 116.4(5) . . ? 
C10 O3 Li1 115.8(4) . . ? 
C9 O3 Li1 127.8(4) . . ? 
O6 C15 C14 110.4(5) . . ? 
O2 C2 C6 107.2(4) . . ? 
O2 C2 C8 107.1(4) . . ? 
C6 C2 C8 112.5(4) . . ? 
O2 C2 C7 107.5(4) . . ? 
C6 C2 C7 111.0(4) . . ? 
C8 C2 C7 111.2(4) . . ? 
O8 C19 C18 108.2(4) . . ? 
O3 C10 C11 113.7(5) . . ? 
O5 C14 C15 109.0(4) . . ? 
O1 C1 C4 106.8(5) . . ? 
O1 C1 C5 106.8(5) . . ? 
C4 C1 C5 111.2(5) . . ? 
O1 C1 C3 106.2(5) . . ? 
C4 C1 C3 112.6(6) . . ? 
C5 C1 C3 112.7(6) . . ? 
O4 Li1 O3 77.1(3) . . ? 
O4 Li1 O5 166.1(4) . . ? 
O3 Li1 O5 92.6(3) . . ? 
O4 Li1 O8 96.1(3) . . ? 
O3 Li1 O8 95.1(3) . . ? 
O5 Li1 O8 94.1(3) . . ? 
O4 Li1 O7 95.8(3) . . ? 
O3 Li1 O7 170.3(4) . . ? 
O5 Li1 O7 95.4(3) . . ? 
O8 Li1 O7 78.8(3) . . ? 
O4 Li1 O6 95.0(3) . . ? 
O3 Li1 O6 95.6(3) . . ? 
O5 Li1 O6 76.6(3) . . ? 
O8 Li1 O6 166.1(4) . . ? 
O7 Li1 O6 91.7(3) . . ? 
O4 C11 C10 115.0(5) . . ? 
 
_diffrn_measured_fraction_theta_max    0.961 
_diffrn_reflns_theta_full              26.73 
_diffrn_measured_fraction_theta_full   0.961 
_refine_diff_density_max    1.015 
_refine_diff_density_min   -2.442 
_refine_diff_density_rms    0.168 
